RESEARCH ARTICLE

# Photoinactivation vs repair of photosystem II as target of thermal stress in epipelagic and epipsammic microphytobenthos communities

Cláudia Bárto<sup>1</sup>, Silja Frankenbach<sup>1</sup>, João Serôdio<sup>1\*</sup>

CESAM – Centre for Environmental and Marine Studies and Department of Biology, University of Aveiro, Aveiro, Portugal

<sup>\*</sup> These authors contributed equally to this work.

\* [jserodio@ua.pt](mailto:jserodio@ua.pt)

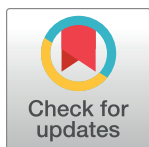

## OPEN ACCESS

**Citation:** Bárto C, Frankenbach S, Serôdio J (2023) Photoinactivation vs repair of photosystem II as target of thermal stress in epipelagic and epipsammic microphytobenthos communities. PLoS ONE 18(9): e0292211. <https://doi.org/10.1371/journal.pone.0292211>

**Editor:** Rajagopal Subramanyam, University of Hyderabad School of Life Sciences, INDIA

**Received:** July 12, 2023

**Accepted:** September 14, 2023

**Published:** September 28, 2023

**Copyright:** © 2023 Bárto et al. This is an open access article distributed under the terms of the [Creative Commons Attribution License](https://creativecommons.org/licenses/by/4.0/), which permits unrestricted use, distribution, and reproduction in any medium, provided the original author and source are credited.

**Data Availability Statement:** All relevant data are within the paper and its [Supporting information](#) files.

**Funding:** This work was supported by project SearchLight (PTDC/BIA-BMA/1058/2021) and CESAM UIDP/50017/2020 + UIDB/50017/2020 + LA/P/0094/2020, funded by national funds (OE) through FCT/MCTES. SF was supported by the Individual Call to Scientific Employment Stimulus - 4th Edition (2021.02653.CEECIND). The funders had no role in study design, data collection and

## Abstract

Microphytobenthos (MPB) inhabiting intertidal flats are exposed to large and sudden changes in temperature, often simultaneously with exposure to direct sunlight. These conditions are expected to negatively impact photosynthesis by exacerbating the photoinhibition under high light. This study addressed the photoinhibitory effects of short-term exposure to cold (5°C) and moderate heat (35°C) on MPB dominated by motile epipelagic (EPL) and immotile epipsammic (EPM) diatom species, by evaluating the seasonal variation of photoinactivation and repair of photosystem II (PSII). The susceptibility to PSII photoinactivation and the counteracting repair capacity were measured by the constant rates  $k_{PI}$  and  $k_{REC}$ , respectively. The photoacclimation state was characterized by hysteresis light-response curves (HLC) of the relative electron transport rate,  $rETR$ , and of the nonphotochemical quenching index  $Y(NPQ)$ . Under non-stress conditions (20°C),  $k_{REC}$  was on average almost 10x higher than the corresponding  $k_{PI}$  ( $20.4$  vs  $2.70 \times 10^{-4} s^{-1}$ , respectively), indicating the operation of efficient repair mechanisms. Overall, the exposure to low and high temperatures affected both PSII photoinactivation and repair but causing smaller impacts in the former than in the latter. Also, cold stress caused larger effects on repair (decrease of  $k_{REC}$ ) than on photoinactivation (increase of  $k_{PI}$ ), but heat stress affected similarly the two processes. These effects varied seasonally, suggesting a role of thermal acclimation, as heat stress had stronger effects in cold-acclimated samples and cold stress resulted in stronger effects in heat-acclimated samples. The changes in  $k_{PI}$  and  $k_{REC}$  occurred despite the high light-acclimated phenotype found all year round, indicating that these processes vary independently from the photoacclimation state. The results also showed that photoprotection processes, as measured by energy-dependent non-photochemical index  $q_E$ , appear to have an important role, both by preventing PSII photoinactivation and by alleviating the impacts on PSII repair under acute thermal stress.

analysis, decision to publish, or preparation of the manuscript." (L976-977).

**Competing interests:** The authors have declared that no competing interests exist.

## Introduction

Much of the interest in the study of microphytobenthos (MPB) stems from its role as main contributor to the primary productivity of estuarine and shallow subtidal coastal areas. MPB communities are particularly abundant in intertidal sediment flats, where they support high rates of photosynthetic carbon fixation [1, 2], as well as several associated ecosystem services [3]. The interest in MPB has been further fueled by the apparent contrast between the unique combination of extreme conditions that shape their sedimentary habitat and commonly observed high photosynthetic activity and productivity. In fact, most photosynthesis of intertidal MPB occurs during diurnal low tide, during which the microalgae are subjected to large and rapid fluctuations in the main abiotic factors [4–6], including the exposure to supersaturating irradiances for prolonged periods [7, 8], extreme high and low temperature [9, 10], extreme salinities [8] and desiccation [11]. Additionally, the sedimentary environment is characterized by steep vertical physico-chemical gradients and a very thin photic zone [1] which, in combination with frequent bioturbation and resuspension/deposition, cause the displacement of large amounts of microalgae to the aphotic layers of the sediment [12].

One way these conditions may cause significant limitations on photosynthesis and growth is through photoinhibitory damage of the photosynthetic apparatus during high light periods, exacerbated by extreme levels of other abiotic factors like temperature or salinity. Photoinhibition causes the net loss of active photosystem II (PSII; see Table 1 for notation) units, leading to a light-induced loss of photosynthetic performance and associated capacity for photochemical generation of ATP and NADPH [13]. The detrimental effects of photoinhibition of

**Table 1. Notation.**

| Parameter         | Description                                                                                                           |
|-------------------|-----------------------------------------------------------------------------------------------------------------------|
| $\alpha$          | Initial slope of a rETR vs. E curve ( $\mu\text{mol quanta}^{-1} \text{m}^2 \text{s}$ )                               |
| $\Delta F/F_m'$   | Effective quantum yield of PSII                                                                                       |
| E                 | PAR irradiance ( $\mu\text{mol quanta m}^{-2} \text{s}^{-1}$ )                                                        |
| $E_{50}$          | E level for 50% of $Y(\text{NPQ})_m$ in a $Y(\text{NPQ})$ vs. E curve ( $\mu\text{mol quanta m}^{-2} \text{s}^{-1}$ ) |
| $E_k$             | Light-saturation parameter of a rETR vs. E curve ( $\mu\text{mol quanta m}^{-2} \text{s}^{-1}$ )                      |
| F                 | Steady-state fluorescence emitted under ambient light                                                                 |
| $F_m, F_m'$       | Maximum fluorescence measured in dark- and light-acclimated samples                                                   |
| $F_v/F_m$         | Maximum quantum yield of PSII                                                                                         |
| $\%F_v/F_m$       | Relative variation of $F_v/F_m$ following light exposure                                                              |
| H                 | Hysteresis index                                                                                                      |
| HLC               | Hysteresis light-response curve                                                                                       |
| $k_{PI}, k_{REC}$ | Rate constants of photoinactivation and repair of PSII ( $\text{s}^{-1}$ )                                            |
| n                 | Sigmoidicity coefficient of the $Y(\text{NPQ})$ vs. E curve                                                           |
| NPQ               | Non-photochemical quenching                                                                                           |
| $\Phi_{PI}$       | Relative quantum yield of photoinactivation ( $\text{m}^2 \mu\text{mol quanta}^{-1}$ )                                |
| PAR               | Photosynthetically Active Radiation                                                                                   |
| PSII              | Photosystem II                                                                                                        |
| $q_E$             | Energy-dependent quenching                                                                                            |
| rETR              | Relative electron transport rate of PSII                                                                              |
| rETR <sub>m</sub> | Maximum rETR in a rETR vs. E curve                                                                                    |
| XC                | Xanthophyll cycle                                                                                                     |
| $Y(\text{NPQ})$   | Regulated thermal energy dissipation related to NPQ                                                                   |
| $Y(\text{NPQ})_m$ | Maximum $Y(\text{NPQ})$ value of a $Y(\text{NPQ})$ vs. E curve                                                        |
| $Y(\text{NPQ})_0$ | $Y(\text{NPQ})$ value for $E = 0$ during a light-decreasing $Y(\text{NPQ})$ vs. E curve                               |

<https://doi.org/10.1371/journal.pone.0292211.t001>

photosynthesis and productivity depend on the balance between the photoinactivation of PSII, associated to the degradation of the protein D1, and the continuous counteracting repair of damaged PSII units, through the *de novo* synthesis of this protein [14]. The PSII repair involves the energetically expensive removal and replacement of damaged protein subunits, adding to the high metabolic costs of the photoinhibitory process [13, 15].

The photoinactivation and repair of PSII have different ecophysiological implications, being often of interest to study and quantify these two processes separately. This is typically achieved through the measurement of the rate constants of PSII photoinactivation ( $k_{PI}$ ) and of PSII repair ( $k_{REC}$ ), usually by quantifying the decrease over time of photosynthetic oxygen evolution or of the maximum quantum yield of PSII (the chlorophyll fluorescence index  $F_v/F_m$ ) on untreated samples and on samples treated with inhibitors of protein synthesis (e.g. lincomycin) [16]. Physiologically relevant photoinhibition of PSII occurs when the rate of PSII photoinactivation exceeds the rate of PSII repair. However, the net impact of photoinhibition on photosynthetic performance will depend on the efficiency of various photoprotective processes that contribute to maintain  $k_{PI}$  lower than  $k_{REC}$ . These processes can be classified in two main groups, depending on their nature and form of action: processes that limit the amount of light energy that is absorbed by the photosynthetic apparatus, and processes that limit the photodamage caused by absorbed energy [17].

The high rates of photosynthesis achieved by the MPB under the extreme conditions of the estuarine intertidal environment has been attributed to the combined operation processes of the two types. On one hand, the behavioral regulation of light exposure by motile diatoms, the group of microalgae that dominates MPB communities: through vertical migration across the thin photic zone of the sediment, diatom cells are able to select light conditions that optimize photosynthesis while minimizing photodamage, an idea encapsulated in the 'behavioral photoprotection' or 'behavioral photoregulation' hypothesis [18–20]. On the other hand, the regulated dissipation of absorbed light energy, mainly through the non-photochemical quenching (NPQ) of chlorophyll fluorescence (energy-dependent quenching,  $q_E$ ) mediated by the xanthophyll cycle [21, 22]. It was long hypothesized that the two types of processes might not operate independently from each other, but that an interplay between motility-based and physiological photoprotective mechanisms could occur, in the form of a trade-off between the two: having the ability to regulate the experienced light through vertical migration, motile diatoms possess a reduced physiological photoprotective capacity in comparison with immotile forms [22–24]. These hypotheses prompted a number of studies on the relative importance of behavioral and physiological protection in MPB [22, 23, 25–29]. An approach commonly followed to evaluate the role of diatom motility has been to compare epipelagic (EPL) and epipsammic (EPM) diatoms, species that are closely related taxonomically but with distinct capacity for directed motility: the former are biraphid pennates, motile and dominant in fine sediments, while the latter are predominantly non-motile or slowly motile forms that inhabit coarser sediments [22, 30–35]. Recent studies support the motility-physiology trade-off. In comparison with EPM forms, EPL forms (i) show a weaker physiological photoprotection capacity, evaluated both in terms of cellular pools of xanthophyll cycle (XC) energy-dissipating pigments [25, 30, 32] and of maximum NPQ [22, 28, 36], and (ii) are more susceptible to photoinactivation and less dependent on the XC for preventing photodamage, relying more on vertical migration and PSII repair [31].

Another process that may affect the susceptibility to PSII photoinactivation and repair capacity is photoacclimation [37–39]. Photoacclimation allows for the regulated adjustment of phenotypical functional traits (e.g., pigment content, thylakoid stacking) to improve the match between photosynthetic performance and the experienced growth light environment. Changes in the photoacclimation state can alter the susceptibility to PSII photoinhibition, through

changes in cellular pigment content, including chlorophyll *a* and photoprotective xanthophyll cycle pigments, and in the efficiency of excitation delivering to the PSII reaction center [13, 38], and through changes in the efficiency of PSII repair, by changes in the rate of D1 protein synthesis [14]. In comparison to acclimation to high light conditions, acclimation to low light tends to increase PSII photoinactivation and to decrease PSII repair capacity [40–42], often leading to photoinactivation rates that exceed those of counteracting repair [40, 43–45]. However, it has also been reported that an increase in growth light may lead to a decrease in  $k_{PI}$  [46, 47].

In the intertidal flats inhibited by MPB, exposure to high light is often accompanied by the exposure to large and sudden changes in temperature, which may reach extreme low and high levels [5, 8, 10]. This is because light exposure is mostly restricted to low tide periods, when the air-exposed sediment undergoes heat exchanges with the atmosphere, typically suffering after tidal ebb a rapid cooling during winter days and a rapid warming during summer days [4]. Temperature has been recognized as a main abiotic controlling factor of the photosynthesis of intertidal MPB and the exposure to extreme low and high temperature conditions is expected to exacerbate the photoinhibitory effects of high light and target differently the PSII photoinactivation and repair processes. Furthermore, it is expectable that variations in ambient temperature cause changes in the thermal acclimation state of microphytobenthic cells, altering their responses to high light under cold or heat conditions. Despite the expected importance of extreme temperatures on MPB photoinhibition, available studies have not distinguished PSII photoinactivation and repair [8, 48] or, when quantifying them separately, did not address the effects of temperature [31]. Also, both the effects of photo- and of thermal acclimation on  $k_{PI}$  or  $k_{REC}$  were never studied on natural MPB communities.

This study addressed the effects of cold and moderate heat on the PSII photoinactivation and repair of natural MPB. The effects were assessed by quantifying the respective rates  $k_{PI}$  and  $k_{REC}$  on communities with different motility capacity (EPL and EPM), collected at four different occasions along one year to cover for possible naturally occurring changes in photo- and thermal acclimation state. The main objectives were: (i) quantify the effects of thermal stress (cold and moderate heat) on PSII photoinactivation and on repair in natural EPL and EPM communities, to better understand if cellular motility may affect the balance between the two processes under abiotic stress; (ii) evaluate the possible effects of photo- and thermal acclimation state on the photoinhibitory responses under cold and moderate heat; (iii) characterize the dependency between PSII photoinactivation and repair, and photoprotective capacity, and how it varies under extreme temperatures.

## Materials and methods

### Sampling

Sediment samples were collected in two sedimentary intertidal sites of the Ria de Aveiro (northwest coast of Portugal) known to harbor MPB communities dominated by pennate diatoms, one characterized by fine sediment particles and dominance of EPL diatom species (Vista Alegre, 40° 35' 00" N, 08° 41' 15" W; hereafter VA-EPL) and the other comprised of sandy mud and dominated by EPM diatom species (Gafanha da Encarnação, 40° 37' 34" N, 08° 44' 14" W; hereafter GE-EPM) [20, 31]. Details about the sampling sites (location, tidal height, sediment characteristics) can be found in [12]. Sampling was carried out on four occasions from mid-Autumn of 2020 to mid-Summer of 2021, to cover one full seasonal cycle. The dates of sampling were the following: 17–18 November, 1–2 February, 28–29 April, 21–22 July. For each sampling period, the site VA-EPL was sampled on the first day and GE-EPM on the following day. Sampling of different days was necessary as it was not possible to carry out the laboratory measurements for the two sampling sites on the same day. Sampling was always

done during diurnal low tide of spring tides, which for these sites corresponds to the middle of the day. No permits were required to access the field site where samples were collected.

All measurements were carried out on cell suspensions, prepared from sediment samples as described by [31]. Sediment was sieved by a 1 mm mesh and kept immersed overnight in filtered natural seawater collected at the sampling site. All photophysiological measurements were carried out on the next day. For taxonomical identification, cells were collected using the 'lens tissue' technique of [49], by applying two layers of lens tissue (lens cleaning tissue 105, Whatman) on the surface of the sediment while exposed to low white light (150 W halogen lamp,  $80 \pm 10 \mu\text{mol quanta m}^{-2} \text{s}^{-1}$ ) for 2 h. The cells were collected from the upper piece of lens tissue, resuspended in filtered natural seawater.

## PSII photoinactivation and repair

The susceptibility to PSII photoinactivation and the counteracting repair capacity were evaluated by measuring the constant rates of PSII inactivation and repair  $k_{PI}$  and  $k_{REC}$ , respectively. The two rate constants were determined by running light stress-recovery experiments (LSE) and measuring the relative decrease in the maximum quantum yield of PSII caused by exposure to high light,  $\%F_v/F_m$  (ratio between post- and pre-stress  $F_v/F_m$  values; see below), in untreated (control) and lincomycin-treated replicated cell suspensions, as described by [16]. Under the assumptions that (i) the reduction of the pool of functional PSII can be estimated by the light-induced change of  $F_v/F_m$  and (ii) PSII photoinactivation and repair occur simultaneously and are described as two opposite first-order reactions [50, 51],  $\%F_v/F_m$  can be related to  $k_{PI}$  and  $k_{REC}$  through:

$$\%F_v/F_m = \frac{k_{REC} + k_{PI}e^{-(k_{REC}+k_{PI})T}}{k_{REC} + k_{PI}} \quad (1)$$

where T is the duration of high light exposure during the LSE. Using lincomycin as an inhibitor of the *de novo* synthesis of the chloroplast-encoded PSII protein D1 and repair of photoinactivated PSII,  $k_{PI}$  was determined from Eq (1) and  $\%F_v/F_m$  measured on lincomycin-treated samples, considering  $k_{REC} = 0$ . Using the value of  $k_{PI}$  thus calculated (average of three replicates, see below),  $k_{REC}$  was estimated by solving Eq (1) numerically using MS Excel Solver.

LSE consisted of: (i) a pre-stress period (15 min, dark), (ii) a light stress period (45 min,  $1020 \mu\text{mol quanta m}^{-2} \text{s}^{-1}$ ), and (iii) post-stress period (15 min, dark). During the pre- and post-stress periods,  $F_v/F_m$  was measured every 5 min.  $k_{PI}$  and  $k_{REC}$  were calculated using Eq (1) on the basis of the last  $F_v/F_m$  values measured during the pre- and post-stress periods. Lincomycin (lincomycin hydrochloride; Alfa Aesar, Germany) was added in the dark 30 min before the start of the LSE. A stock solution was prepared, and its pH was adjusted to the pH found at the sampling site using NaOH (0.14 M, Sigma-Aldrich). The final lincomycin concentration was 2 mM.

## Photoprotection capacity

The values of post-stress  $F_v/F_m$  measured after the 15 min relaxation on untreated samples, expressed as a percentage of pre-stress levels, were used to estimate the energy-dependent non-photochemical index,  $q_E$ , and to evaluate the photoprotective capacity [48].

## LSE and effects of temperature

A custom-made setup was used to run multiple LSE in parallel under controlled temperature conditions (Fig 1). It comprised a 3D-printed holder for six 10 x 10 spectrophotometer cuvettes mounted on a water jacket connected to a thermostatic water bath (P selecta, Frigiterm, Spain),

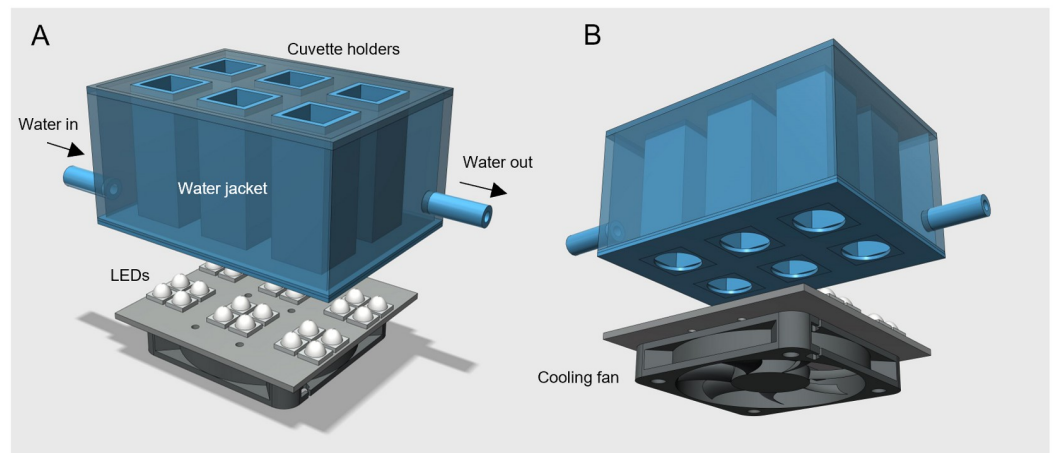

**Fig 1. Illumination system.** Exploded view of the illumination system used in this study, showing its main components. (A) Custom-designed, 3D-printed multi-cuvette holder and water jacket (blue), and square  $8 \times 8$  SMD LED panel with individual  $30^\circ$  lenses (grey; only the 6 groups of 4 LEDs used for illuminating the cuvettes are shown). The water jacket was connected to a water bath allowing maintaining the 6 cuvettes at the desired temperature while being simultaneously illuminated from below. (B) Fan to dissipate the heat generated by the LEDs, placed beneath the LED panel. For simplicity, the holders used to fix the LED panel to the cuvette holder and the fan to the LED panel were omitted. The STL file for the 3D-printed water jacket is available as (S1 File). Details on the LED emission spectra and control, as well as other 3D-printed parts, are provided in [52].

<https://doi.org/10.1371/journal.pone.0292211.g001>

and a RGBW LED panel illuminating the samples from below. The STL file for the 3D-printed cuvette holder and water jacket is available as (S1 File). To increase the light intensity delivered to the samples, each cuvette was illuminated by four LEDs. The LEDs were controlled by an Arduino Uno R3 microcontroller (<http://www.arduino.cc>), providing a mixture of white, red, green and blue light, corresponding to a PAR of  $1020 \mu\text{mol quanta m}^{-2} \text{s}^{-1}$ , as measured with a calibrated submersible spherical US-SQS/L micro-quantum sensor (Heinz Walz GmbH, Germany), positioned at mid-height of a cuvette filled with distilled water (1.25 ml, same volume as the cell suspensions). Details about the spectra and the controlling of the LEDs are given by [52]. The six cuvettes were stirred during the entire LSE using  $5 \times 2$  mm magnetic bars and by placing the cuvette holder on top of a magnetic stirrer (Stuart CB162, Bibby Sterilin Ltd, UK) positioned below. For measuring  $F_v/F_m$ , each cuvette was briefly removed from the holder and placed in the optical unit of a chlorophyll fluorometer (see below), and immediately returned. This setup allowed to run six LSEs simultaneously (three untreated and three lincomycin-treated samples) and to determine  $k_{PI}$ ,  $k_{REC}$  and  $q_E$  for cell suspensions exposed to 5, 20 and  $35^\circ\text{C}$  on the same day (for each sampling site, day after collection). Samples were first exposed to each temperature for 15 min before the start of the corresponding LSE.

### Photoacclimation state

The photoacclimation state of the cell suspensions was characterized by measuring hysteresis light-response curves (HLC; [53]) of the relative electron transport rate,  $rETR$ , and of the non-photochemical quenching index  $Y(NPQ)$ , given respectively by:

$$rETR = E \frac{F'_m - F}{F'_m} \quad (2)$$

and

$$Y(NPQ) = \frac{F}{F'_m} - \frac{F}{F_m} \quad (3)$$

where  $E$  is the incident irradiance,  $F_m$  and  $F_m'$  are the maximum fluorescence measured of dark-adapted and illuminated samples, respectively, and  $F$  is the steady-state fluorescence emitted under ambient light. HLCs were generated by sequentially applying eight levels of actinic light (6, 19, 74, 167, 473, 791, 1390, 2196  $\mu\text{mol quanta m}^{-2} \text{s}^{-1}$ ) first in increasing order (light-increasing phase) and then in decreasing order (light-decreasing phase). Samples were dark acclimated for 15 min before the start of the measurements and were then exposed to each light level for 120 s throughout the entire HLC. HLCs of rETR and of Y(NPQ) were characterized by fitting the model of [54] and of [55], respectively, using a procedure written in Microsoft Visual Basic and based on Microsoft Excel Solver [31]. On some occasions, it was observed 'dark NPQ', i.e., values of Y(NPQ) > 0 for low light levels. In these cases, for model fitting purposes, the values of Y(NPQ) for  $E$  levels lower than the one corresponding to Y(NPQ) = 0 were considered as null, forcing the model to only characterize the high light-induced NPQ processes. The models were fitted separately to the light-increasing and light-decreasing parts of each HLC. rETR HLCs were characterized by estimating the initial slope,  $\alpha$ , the maximum rETR level, rETR<sub>m</sub>, and the photoacclimation parameter,  $E_k$ . Y(NPQ) HLCs were characterized by estimating the maximum Y(NPQ) level, Y(NPQ)<sub>m</sub>, the irradiance level for 50% Y(NPQ)<sub>m</sub>,  $E_{50}$ , and the sigmoidicity coefficient,  $n$ . When the values of Y(NPQ) did not reach zero during the light-decreasing phase of the HLC, curves the model of [55] was modified as described in [53]. The magnitude and direction of the hysteresis were quantified by the non-parametric hysteresis index  $H$ , based on the normalized difference between the upward and downward phases of each HLC [53]. Three replicated HLCs were measured for each sampling site on each sampling occasion, each during the period of high light exposure of the three LSE carried out to measure  $k_{PI}$ ,  $k_{REC}$  and  $q_E$  under each tested temperature (section above).

## Chlorophyll fluorescence

All chlorophyll fluorescence measurements were carried out using a Multi-Color PAM fluorometer (Heinz Walz GmbH) with an MCP-D detector unit fitted with an RG 665 long pass filter (>650 nm, 3 mm RG665, Schott), and controlled by the PamWin V3.12w software. Blue light peaking at 440 nm was used for the measuring light and white light was used for actinic light and the saturating light pulses (800 ms). The fluorescence was measured in 10×10×45 mm acrylic cuvettes (Sarstedt, Germany) using the ED-101US/MD optical unit, coupled to a magnetic stirrer (PHYTO-MS Miniature Magnetic Stirrer, Walz). The fluorometer was zeroed using filtered seawater as a blank.

## Taxonomical composition

Sub-samples of the cell suspensions were fixed in Lugol's solution (5% v/v) (5% iodine, Appli-Chem; ITW Reagents; USA) and viewed under a bright-field microscope for determination of the relative abundance of major taxonomic groups (diatoms, euglenophytes and cyanobacteria). A Naegeotte cell counting chamber (Blau Brand; Germany) was used to count a minimum of 300 cells at 40x magnification. Diatom identification was performed on sub-samples oxidized using concentrated nitric acid (1/4 v/v) and potassium permanganate. Fully oxidized samples were then mounted on a microscopy slide using Naphrax (Northern Biological Supplies, UK) to prepare permanent microscopy slides. Taxa identification was performed at 100x magnification with a minimum number of individual valves of at least 700 cells or valves for each site and sampling occasion. Diatom identification was based on morphological features of the valves, including its shape, length and width but also raphe presence, length and shape, patterns within the striae, and ornamentation features of the frustule [56–58].

## Statistical analyses

Measurements made on different sampling dates and sites were compared by applying two- or three-way Analysis of Variance (ANOVA), and by post hoc Tukey HSD test. Assumptions of normality and homoscedasticity were verified prior to analysis using the Shapiro–Wilk test and Levene’s test, respectively. In case of violation of assumptions, data were log transformed. All statistical analyses were carried out using SPSS Statistics 142 (IBM, USA).

## Results

### Taxonomic composition

The microalgal communities in both sites were largely dominated by diatoms all year round (minimum 96.6%), but lower in VA-EPL (average 89.3%) than in GE-EPM (average 92%). The remaining taxa belonged to the euglenophytes (average 1.8%) and cyanobacteria (average 0.7%). Confirming previous studies, VA-EPL was dominated by motile forms, classifiable as EPL forms, while GE-EPM dominated by motile forms, classifiable as EPM. Nevertheless, several genera were found on the two sampling sites, the more abundant being *Navicula*, *Nitzschia*, *Gomphonema*, *Tryblionella* and *Amphora* (Fig 2). With the exception of VA-EPL in February and GE-EPM in November, two genera accounted for more than 50% of the cell counts, both for VA-EPL and GE-EPM. The muddy site VA-EPL was dominated all year round by diatoms of the genus *Navicula* (between 31.6% in November and 55.7% in July), which also dominated the communities of the sandy site in November and February (between 23.2% in April and 41.1% in February) (Fig 2). However, the communities of the two sites differed regarding the second most abundant genus. In VA-EPL, this was *Nitzschia*, that showed highest abundance in November (29.4%) and decreased steadily towards summer (1.8% in July); in contrast, this genus had very low and relatively constant abundance in the GE-EPM communities (3.3% in July to 6.2% in November). In GE-EPM, the second most abundant genus was *Gomphonema*, with the lowest abundance in November (4.9%) and highest abundances in April and July (33.7% and 39.8%, respectively); in VA-EPL, this genus showed residual abundances in November and February (0.1% and 2.5%, respectively) but reached significant values in April and July (15.7% and 16.6%, respectively). Genera with average abundances between 1.0 and 10.0% included *Tryblionella* (3.6%), *Amphora* (3.1%), *Raphoneis* (2.6%) and *Fallacia* (1.2%) in VA-EPL, and *Amphora* (7.2%), *Craticula* (3.7%), *Frustulia* (1.6%) and *Pseudostaurosira* (1.2%), in GE-EPM. A large number of genera appeared in smaller numbers, often in only one of the sampling occasions. These include the genera *Gyrosigma*, *Surirella* and *Cylindroteca* (VA-EPL) or *Diploneis*, *Fragillaria* and *Coconeis* (GE-EPM).

### Photoacclimation state

As inferred from the upward phase of the HLCs of rETR, both types of communities appeared as high light-acclimated all year round (Fig 3). Photosynthetic activity, as denoted by rETR, saturated at high irradiance levels ( $E_k$  varying between 401.1 and 581.3  $\mu\text{mol quanta m}^{-2} \text{s}^{-1}$ ) (Table 2), reached optimum values at around 1500  $\mu\text{mol quanta m}^{-2} \text{s}^{-1}$ , and showed only a slight decline for the highest irradiance level ( $E = 2250 \mu\text{mol quanta m}^{-2} \text{s}^{-1}$ ) (Fig 3). The light response of rETR was similar across sampling sites and seasons, and no significant differences were found between sites and seasons for both  $\text{ETR}_m$  and  $E_k$  (ANOVA,  $P > 0.089$  in all cases), although there was a tendency for lower  $E_k$  values in Autumn and Winter and higher in Spring and Summer, at both sites. The VA-EPL samples appeared generally acclimated to higher light, as, with the exception of April, they showed higher  $\text{rETR}_m$  and  $E_k$  values. However,

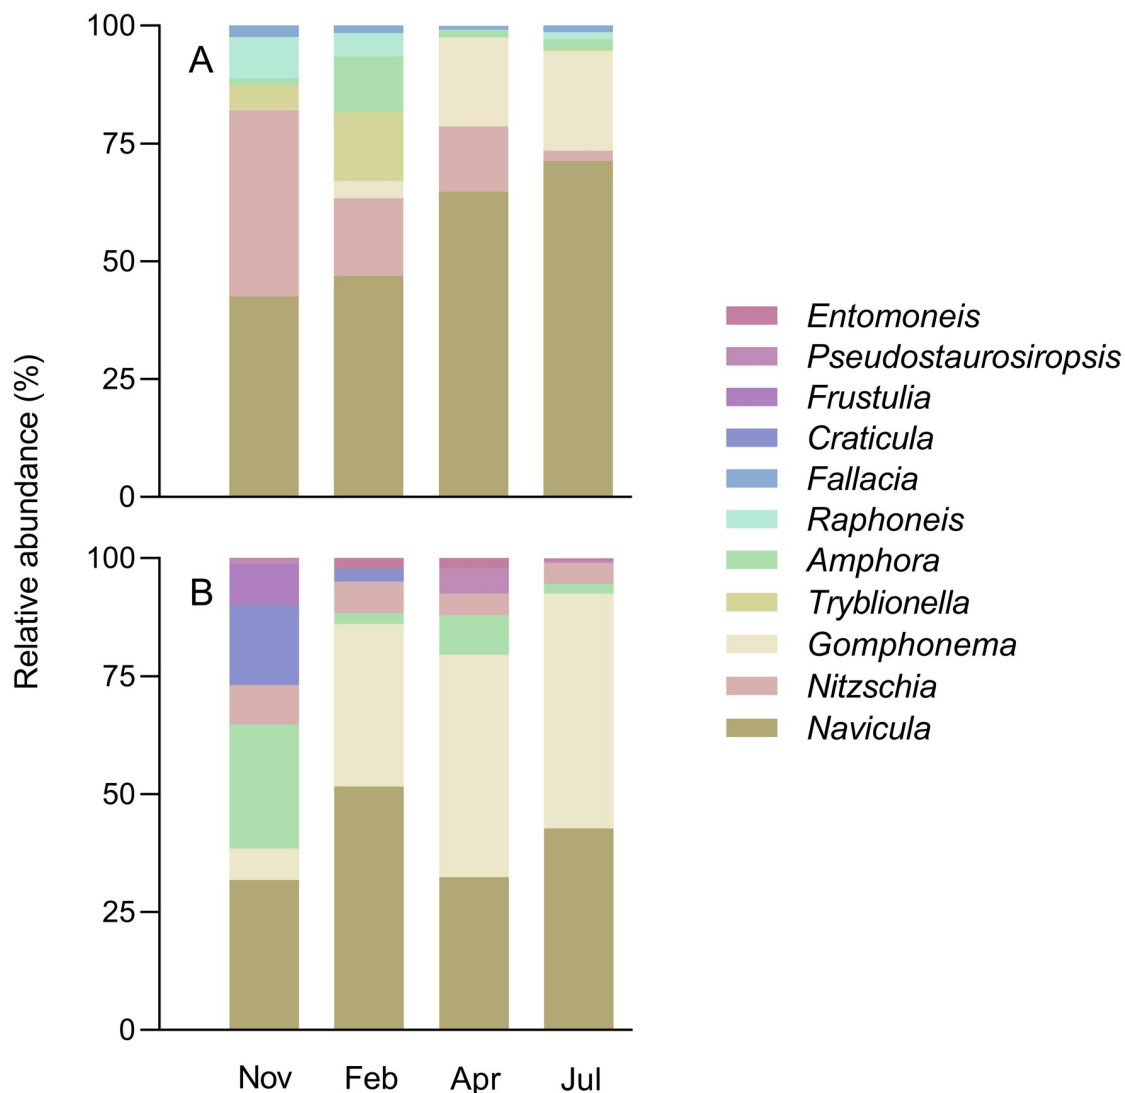

**Fig 2. Taxonomical composition.** Seasonal variation of the diatom composition of the VA-EPL (A) and GE-EPM (B) communities.  
<https://doi.org/10.1371/journal.pone.0292211.g002>

significant differences were found only for  $\alpha$ , with VA-EPL samples showing higher mean values than the GE-EPM ones (ANOVA,  $F_{1,24}$ ,  $P = 0.018$ ).

Hysteresis was in all cases very low, the H index varying between -0.009 (VA-PL, February) and 0.031 (VA-EPL, April) (Fig 3, Table 2). Only in one case (VA-EPL, February) the hysteresis was negative, and only slightly ( $H = -0.009$ ). No significant differences were found between the mean H values of the two sites (ANOVA,  $F_{1,24}$ ,  $P = 0.600$ ), but a significant variation across seasons was detected (ANOVA,  $F_{3,24}$ ,  $P = 0.012$ ). This seasonal variation was due to minimum H values in February, and comparable values during the rest of the year, in both sampling locations.

The HLCs of Y(NPQ) confirmed that the communities of the two sites were capable of dealing well with high light exposure, consistent with the high light photophenotype inferred from the rETR HLCs. Y(NPQ) HLCs did not saturate until the maximum irradiance applied, and, in various cases, the estimated values of  $Y(NPQ)_m$  were much higher than the highest measurement of the HLC, especially when these were highly sigmoid (e.g. VA-EPL, November and

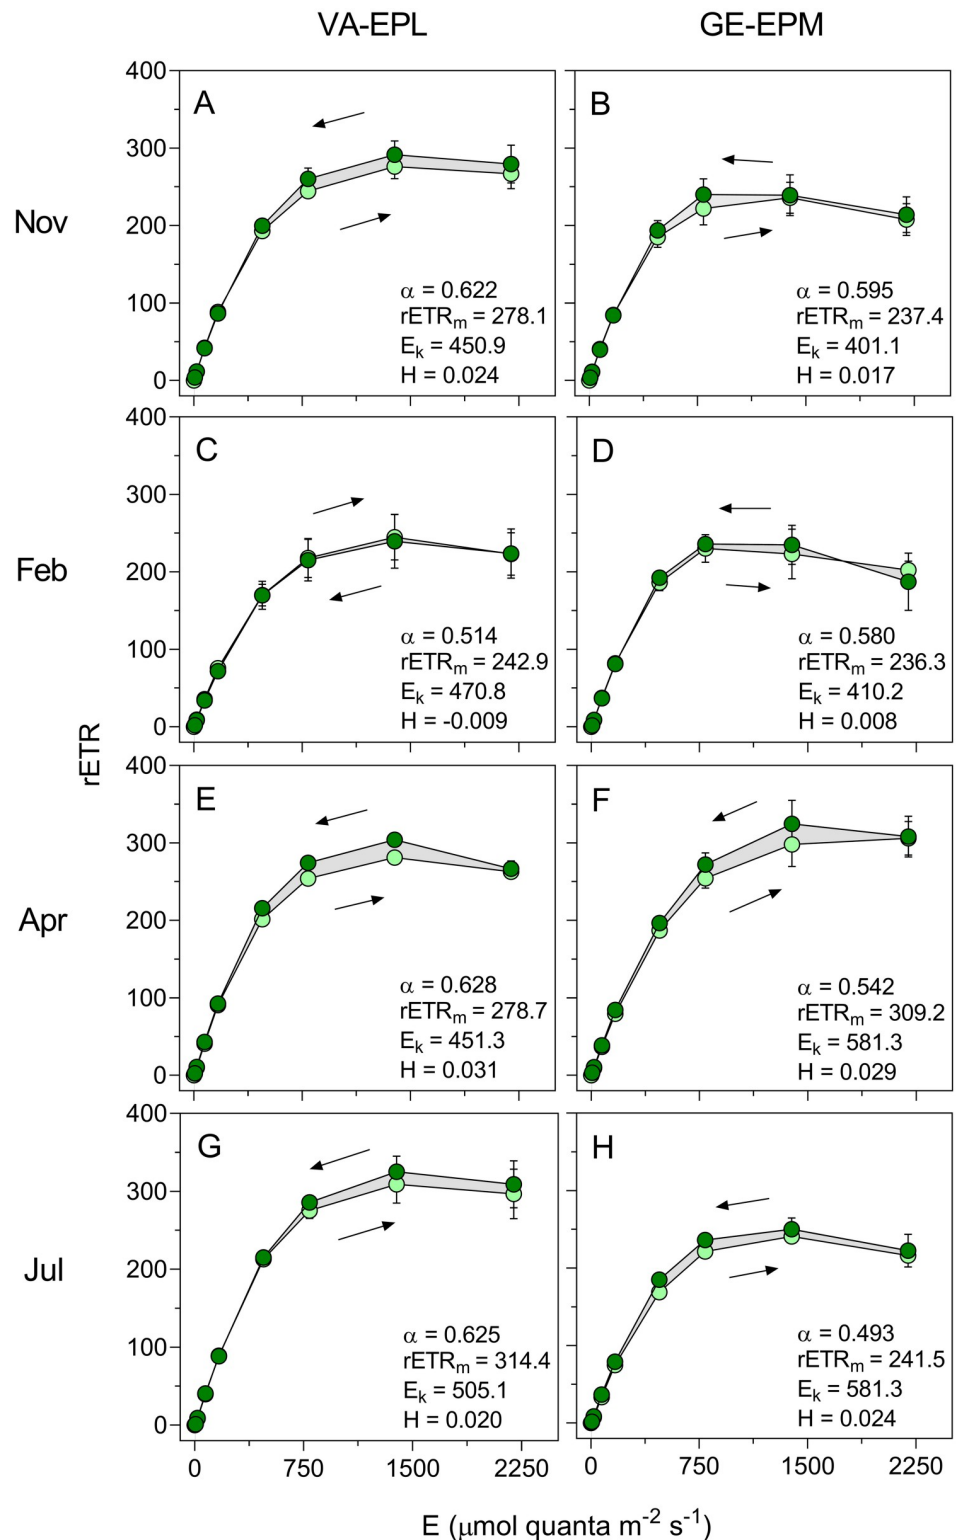

**Fig 3. Seasonal variation of the photoacclimation state: rETR.** Hysteresis light curves (HLC) of relative electron transport rate of PSII (rETR) of samples dominated by epipellic (VA-EPL) (A, C, E, G) and epipsammic (GE-EPM) (B, D, F, H) diatoms. Arrows indicate the order in which the measurements were carried out. Lighter and darker symbols represent measurements made during the light increase and the light decrease phases of the HLC, respectively. Mean values of three replicated HLCs. Error bars represent one standard error. Lines represent the model of Eilers and

Peeters (1988) fitted to the mean values of rETR. The numbers indicate the parameters of the model fitted to the upward LC. The gray area indicates the difference between the integrated upward and downward LCs used to calculate the hysteresis index H.

<https://doi.org/10.1371/journal.pone.0292211.g003>

February) (Fig 4, Table 2). The  $E_{50}$  values were also high (in all but one case, above 900  $\mu\text{mol quanta m}^{-2} \text{ s}^{-1}$ , GE-EPM), indicating the adjustment of the activation of NPQ processes to high light levels.

The VA-EPL samples showed a more pronounced high light-acclimated state, as denoted by the generally higher value of  $\text{NPQ}_m$  (exception: July) and  $E_{50}$  (exception: April). However, no significant differences were found between sites and seasons regarding  $E_{50}$  (ANOVA,  $p > 0.065$  in all cases). In contrast, significant variations were found for both  $\text{Y}(\text{NPQ})_m$  and  $n$  between seasons (ANOVA,  $F_{3,24}$ ,  $p = 0.012$  and ANOVA,  $F_{3,24}$ ,  $p < 0.001$ , respectively) but not between sampling sites (ANOVA,  $F_{11,24}$ ,  $p = 0.061$  and ANOVA,  $F_{1,24}$ ,  $p < 0.210$ , respectively). For both VA-EPL and GE-EPM,  $\text{Y}(\text{NPQ})_m$  tended to reach higher values in November and February, and lower values in April and July. Regarding the index  $n$ , a strong seasonal variation was observed mostly in VA-EPL samples, with higher sigmoidicity in April and July and lower in November and February while for GE-EPM samples a high sigmoidicity was present all year round. 'Dark NPQ' patterns were observed in spring and summer, especially marked in VA-EPL samples, associated to highly sigmoid curves (Fig 4E and 4G). This pattern was only observed in the light-increasing phase of the HLCs, being dissipated after exposure to high light (Fig 4E–4H).

HLCs of  $\text{Y}(\text{NPQ})$  generally showed higher hysteresis levels than the rETR ones. Hysteresis was however still relatively low (and always positive), with  $H$  varying between 0.027 and

**Table 2. rETR and Y(NPQ).** Seasonal variation of the parameters of rETR and Y(NPQ) hysteresis light-response curves measured in EPL- and EPM-dominated communities. Parameter values are given for upward and downward light curves separately. Mean values of three replicated measurements  $\pm$  one standard error.

|        |     |      | rETR              |                  |                  |                    | Y(NPQ)                   |                     |                 |                            |
|--------|-----|------|-------------------|------------------|------------------|--------------------|--------------------------|---------------------|-----------------|----------------------------|
|        |     |      | $\alpha$          | $\text{rETR}_m$  | $E_k$            | $H_{\text{rETR}}$  | $\text{Y}(\text{NPQ})_m$ | $E_{50}$            | $n$             | $H_{\text{Y}(\text{NPQ})}$ |
| VA-EPL | Nov | Up   | 0.622 $\pm$ 0.035 | 278.1 $\pm$ 16.3 | 450.9 $\pm$ 40.3 | 0.024 $\pm$ 0.007  | 1.210 $\pm$ 0.281        | 2632.3 $\pm$ 1440.5 | 0.86 $\pm$ 0.14 | 0.045 $\pm$ 0.008          |
|        |     | Down |                   |                  |                  |                    |                          |                     |                 |                            |
|        | Feb | Up   | 0.514 $\pm$ 0.018 | 236.8 $\pm$ 29.8 | 470.8 $\pm$ 51.2 | -0.009 $\pm$ 0.002 | 2.132 $\pm$ 0.130        | 9704.8 $\pm$ 2107.8 | 0.45 $\pm$ 0.06 | 0.030 $\pm$ 0.004          |
|        |     | Down |                   |                  |                  |                    |                          |                     |                 |                            |
|        | Apr | Up   | 0.629 $\pm$ 0.035 | 282.0 $\pm$ 0.9  | 451.3 $\pm$ 24.9 | 0.031 $\pm$ 0.002  | 0.594 $\pm$ 0.010        | 974.2 $\pm$ 20.1    | 2.98 $\pm$ 0.09 | 0.027 $\pm$ 0.000          |
|        |     | Down |                   |                  |                  |                    |                          |                     |                 |                            |
|        | Jul | Up   | 0.625 $\pm$ 0.012 | 314.4 $\pm$ 25.1 | 505.1 $\pm$ 50.0 | 0.020 $\pm$ 0.006  | 0.562 $\pm$ 0.016        | 1096.1 $\pm$ 66.4   | 3.12 $\pm$ 0.12 | 0.038 $\pm$ 0.016          |
|        |     | Down |                   |                  |                  |                    |                          |                     |                 |                            |
| GE-EPM | All | Up   | 0.597 $\pm$ 0.019 | 279.3 $\pm$ 11.8 | 469.5 $\pm$ 19.5 | 0.016 $\pm$ 0.006  | 1.124 $\pm$ 0.203        | 3601.9 $\pm$ 1210.0 | 1.85 $\pm$ 0.37 | 0.035 $\pm$ 0.004          |
|        |     | Down |                   |                  |                  |                    |                          |                     |                 |                            |
|        | Nov | Up   | 0.595 $\pm$ 0.031 | 237.4 $\pm$ 22.2 | 401.1 $\pm$ 42.4 | 0.017 $\pm$ 0.044  | 0.613 $\pm$ 0.008        | 841.1 $\pm$ 78.7    | 2.08 $\pm$ 0.15 | 0.071 $\pm$ 0.002          |
|        |     | Down |                   |                  |                  |                    |                          |                     |                 |                            |
|        | Feb | Up   | 0.580 $\pm$ 0.016 | 236.3 $\pm$ 23.5 | 410.2 $\pm$ 50.5 | 0.008 $\pm$ 0.007  | 0.650 $\pm$ 0.074        | 916.3 $\pm$ 51.3    | 2.49 $\pm$ 0.41 | 0.022 $\pm$ 0.003          |
|        |     | Down |                   |                  |                  |                    |                          |                     |                 |                            |
| VA-EPL | Apr | Up   | 0.542 $\pm$ 0.037 | 309.2 $\pm$ 23.9 | 581.3 $\pm$ 80.9 | 0.029 $\pm$ 0.007  | 0.566 $\pm$ 0.023        | 1031.0 $\pm$ 92.2   | 2.71 $\pm$ 0.33 | 0.104 $\pm$ 0.025          |
|        |     | Down |                   |                  |                  |                    |                          |                     |                 |                            |
|        | Jul | Up   | 0.493 $\pm$ 0.030 | 241.5 $\pm$ 7.0  | 493.3 $\pm$ 31.9 | 0.024 $\pm$ 0.013  | 0.665 $\pm$ 0.022        | 1063.4 $\pm$ 57.4   | 1.87 $\pm$ 0.01 | 0.071 $\pm$ 0.004          |
|        |     | Down |                   |                  |                  |                    |                          |                     |                 |                            |
|        | All | Up   | 0.553 $\pm$ 0.017 | 256.1 $\pm$ 12.7 | 471.5 $\pm$ 32.0 | 0.019 $\pm$ 0.004  | 0.623 $\pm$ 0.021        | 963.0 $\pm$ 40.7    | 2.29 $\pm$ 0.15 | 0.067 $\pm$ 0.010          |
|        |     | Down |                   |                  |                  |                    |                          |                     |                 |                            |

<https://doi.org/10.1371/journal.pone.0292211.t002>

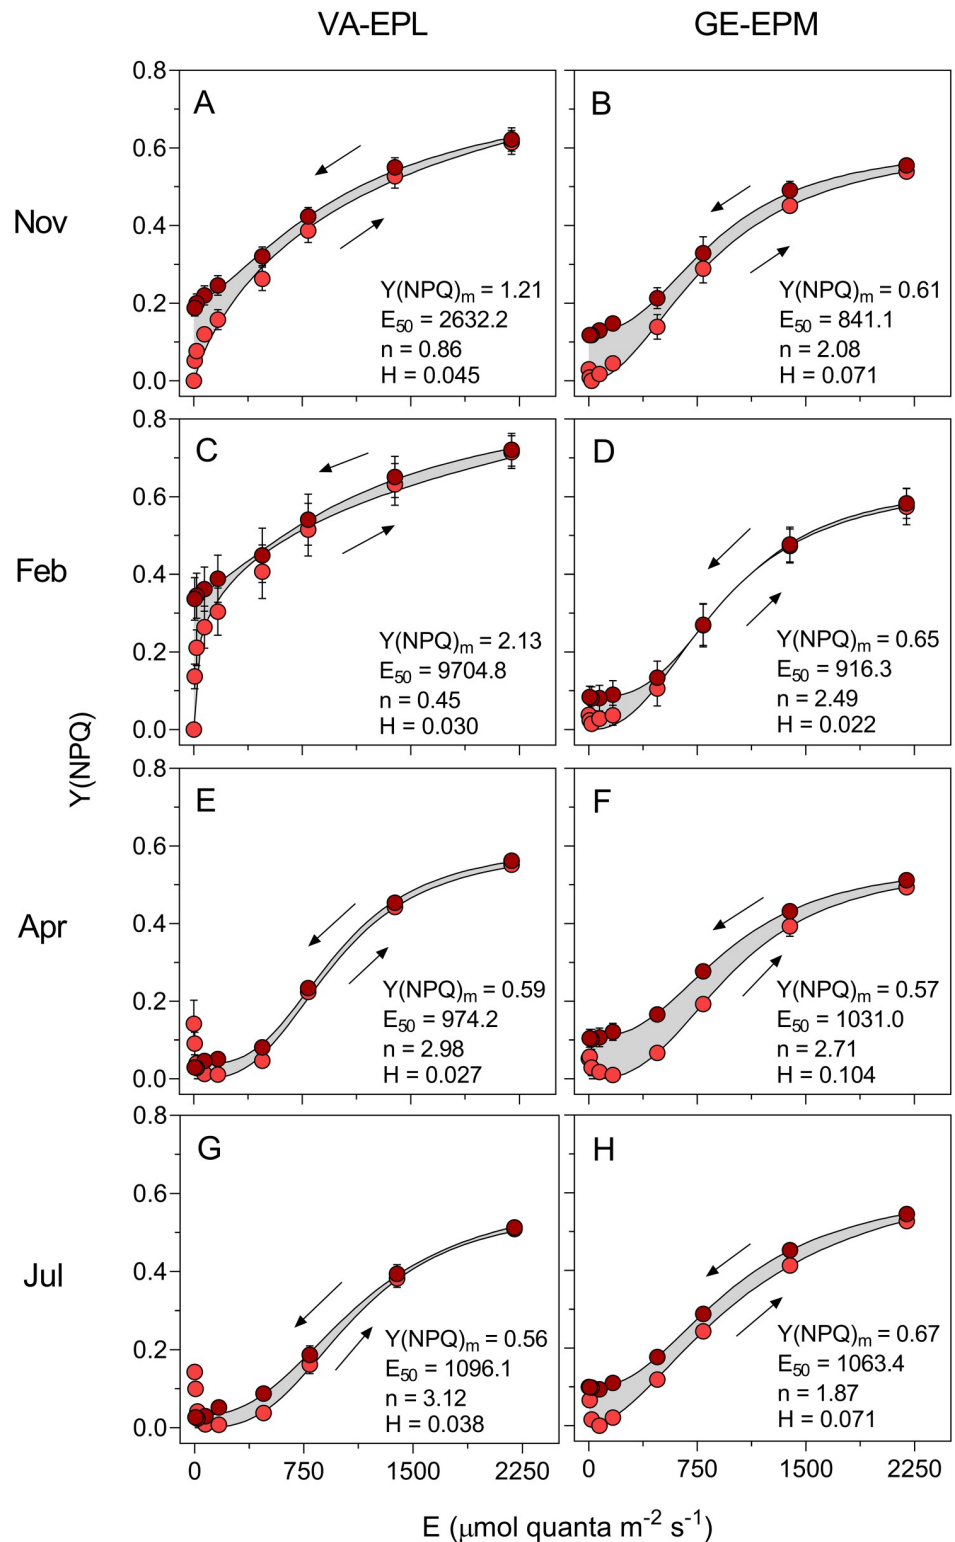

**Fig 4. Seasonal variation of the photoacclimation state:  $Y(NPQ)$ .** Hysteresis light curves of the non-photochemical index  $Y(NPQ)$  of samples dominated by epipelagic (VA-EPL) (A, C, E, G) and epipsammic (GE-EPM) (B, D, F, H). Arrows indicate the order in which the measurements were carried out. Lighter and darker symbols represent measurements made during the light increase and the light decrease phases of the HLC, respectively. Mean values of three replicated HLCs. Error bars represent one standard error. Lines represent the model of Serôdio and Lavaud

(2011) fitted to the mean values of high light induced NPQ measurements. The numbers indicate the parameters of the model fitted to the upward LC. The gray area indicates the difference between the integrated upward and downward LCs used to calculate the hysteresis index H.

<https://doi.org/10.1371/journal.pone.0292211.g004>

0.104, indicating a capacity for fast activation and relaxation of NPQ (Fig 4, Table 2). Significant differences were found between sites (ANOVA,  $F_{1,24}$ ,  $p < 0.001$ ) and between seasons (ANOVA,  $F_{3,24}$ ,  $p = 0.009$ ), as well as an interaction between the two factors (ANOVA,  $F_{3,24}$ ,  $p = 0.007$ ). Apart from February, the H index was always higher in GE-EPM than in VA-EPL samples.

### Seasonal variation of PSII photoinactivation and repair

Fig 5 illustrates the results of LSE for the different tested temperatures (GE-EPM, November). The results for 20°C (Fig 5B) exemplify the main pattern that was observed in these experiments. Before the light stress,  $\%F_v/F_m$  stabilized as the samples acclimated to the test temperature and darkness, with no significant differences between lincomycin-treated and untreated samples. After the high light exposure,  $\%F_v/F_m$  showed a short-term relaxation reaching an apparent steady state within 15 min. A clear difference was observed between lincomycin-treated samples and controls. The former recovered to values of only 43% of pre-stress values, which resulted in  $k_{PI} = 3.2 \times 10^{-4} \text{ s}^{-1}$ ; the latter recovered almost completely, to values around 91% of pre-stress levels. This large difference is indicative of a large capacity for PSII repair, resulting in a high  $k_{REC}$  value ( $31.6 \times 10^{-4} \text{ s}^{-1}$ ), considerably higher than the corresponding  $k_{PI}$ . The large recovery of the untreated samples is also indicative of an efficient photoprotection, quantified by  $q_E = 0.91$ .

This figure also exemplifies the effects of temperature on the rates of PSII photoinactivation and repair. The effects of temperature on  $k_{PI}$  were small, as seen by the comparable levels of  $\%F_v/F_m$  of lincomycin-treated samples, and the resulting values of  $k_{PI} = 3.6$  and  $4.6 \times 10^{-4} \text{ s}^{-1}$ , for 5 and 35°C, respectively, not very different from the value measured at 20°C. In contrast, much larger and diverse effects were observed for  $k_{REC}$ , with cold causing larger effects than moderate heat: under 5°C, there were almost no differences between untreated and lincomycin-treated samples, denoting a low repair capacity ( $k_{REC} = 2.36 \times 10^{-4} \text{ s}^{-1}$ ); for 35°C, a larger difference between controls and inhibited samples was observed which, although not as large as measured under 20°C, also indicated a lowered repair capacity ( $k_{REC} = 5.1 \times 10^{-4} \text{ s}^{-1}$ ). The smaller recovery observed for untreated samples under 5 and 35°C might also indicate a reduced photoprotection capacity, as compared to 20°C.

Considering the entire dataset, the mean annual values of the  $k_{PI}$  observed for the stress-free conditions (20°C) on VA-EPL and GE-EPM samples were very similar ( $2.61$  and  $2.78 \times 10^{-4} \text{ s}^{-1}$ , respectively; non-significant differences, ANOVA,  $F_{1,24}$ ,  $p = 0.199$ ) and close to the overall average of  $2.70 \times 10^{-4} \text{ s}^{-1}$  (Fig 6; Table 3). Significant differences were found between seasons (ANOVA,  $F_{3,24}$ ,  $p < 0.001$ ), with lowest  $k_{PI}$  values occurring in July (both sites) and highest values in February (GE-EPM) and April (V-EPL) (Table 3). GE-EPM samples showed a larger seasonal variation than VA-EPL ones, with mean  $k_{PI}$  values ranging from 1.86 (July) to 3.82 (February), a 105% variation; in contrast, VA-EPL showed a variation of 44% between minimum and maximum values (Fig 6; Table 3).

The  $k_{REC}$  values were in all cases much higher (varying from 4.2 to 15.0 times) than the corresponding  $k_{PI}$ , reaching mean values of  $16.80$  and  $23.67 \times 10^{-4} \text{ s}^{-1}$  for VA-EPL and GE-EPM, respectively. Significant differences were found between sites (ANOVA,  $F_{1,24}$ ,  $p < 0.001$ ) and

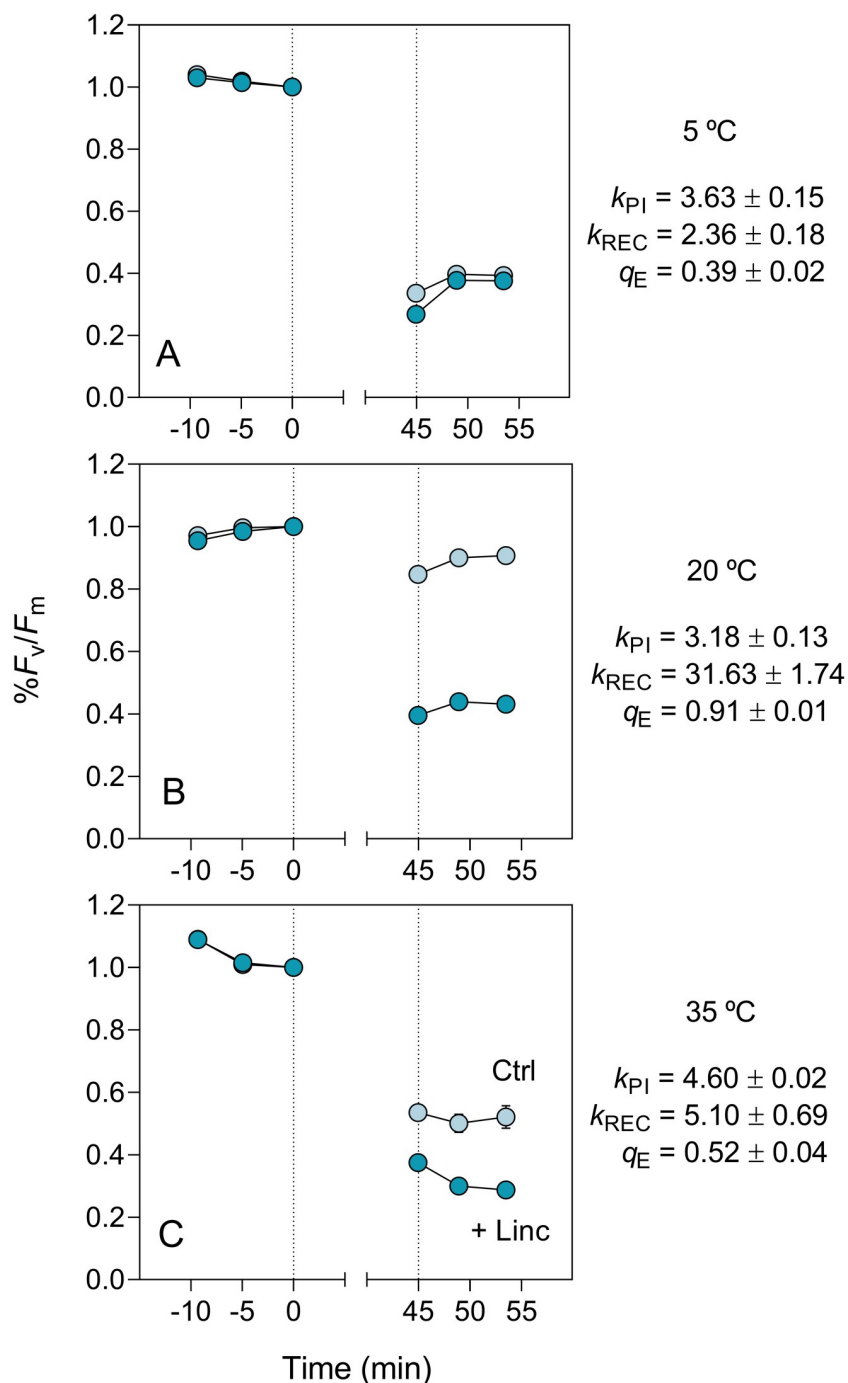

**Fig 5. Light stress-recovery experiments.** Illustrative results showing the impact of exposure to  $1020 \mu\text{mol quanta m}^{-2} s^{-1}$  for 45 min (area between dotted lines) on %F<sub>v</sub>/F<sub>m</sub> in control (untreated; Ctrl) and lincomycin-treated (+Linc) samples incubated at 5 (A), 20 (B) and 35 (C) °C. Data for GE-EPM in November. Units of  $k_{PI}$  and  $k_{REC}$ :  $10^{-4} s^{-1}$ .

<https://doi.org/10.1371/journal.pone.0292211.g005>

seasons (ANOVA,  $F_{3,24}$ ,  $p < 0.001$ ), with minimum values being observed in winter ( $10.93 \times 10^{-4} s^{-1}$ , VA) and summer ( $7.72 \times 10^{-4} s^{-1}$ , GE) (Table 3).  $k_{REC}$  also showed a larger seasonal variation than  $k_{PI}$ , varying by 116% and 344% for VA-EPL and GE-EPM, respectively.

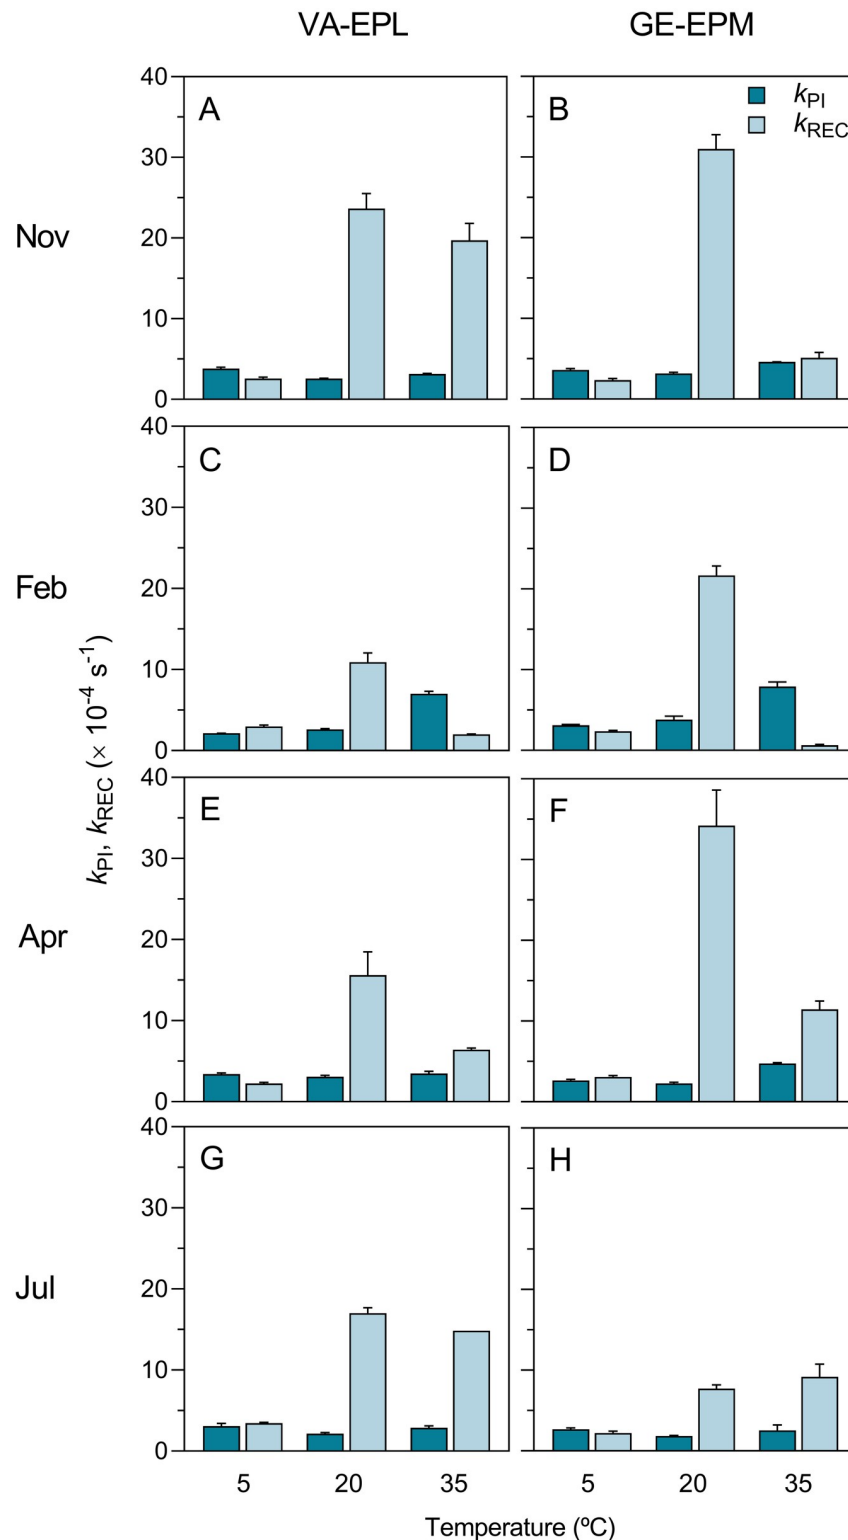

**Fig 6. Seasonal variation of the effects of thermal stress:  $k_{PI}$  and  $k_{REC}$ .** Response to cold (5°C) and heat (35°C) stress of the rate constants of photoinactivation ( $k_{PI}$ ) and repair ( $k_{REC}$ ) of PSII of VA-EPL (A, C, E, G) and GE-EPM (B, D, F, H) communities.

<https://doi.org/10.1371/journal.pone.0292211.g006>

**Table 3.**  $k_{PI}$ ,  $k_{REC}$ ,  $\Phi_{PI}$  and  $q_E$ . Seasonal variation of the rate constant of PSII photoinactivation ( $k_{PI}$ ,  $\times 10^{-4} s^{-1}$ ) and repair ( $k_{REC}$ ,  $\times 10^{-4} s^{-1}$ ) and of the relative quantum yield of photoinactivation ( $\Phi_{PI}$ ,  $\times 10^{-7} m^2 \mu mol quanta^{-1}$ ), measured in EPL- and EPM-dominated communities at 5, 20 and 35°C. Mean values of three replicated measurements  $\pm$  one standard error.

| Temperature |     | VA-EPL          |                 |                  |                 | GE-EPM          |                 |                  |                 |
|-------------|-----|-----------------|-----------------|------------------|-----------------|-----------------|-----------------|------------------|-----------------|
| (°C)        |     | $k_{PI}$        | $\Phi_{PI}$     | $k_{REC}$        | $q_E$           | $k_{PI}$        | $\Phi_{PI}$     | $k_{REC}$        | $q_E$           |
| 5           | Nov | $3.83 \pm 0.16$ | $3.75 \pm 0.12$ | $2.58 \pm 0.16$  | $0.40 \pm 0.02$ | $3.63 \pm 0.15$ | $3.56 \pm 0.13$ | $2.36 \pm 0.18$  | $0.39 \pm 0.02$ |
|             | Feb | $2.14 \pm 0.02$ | $2.10 \pm 0.02$ | $2.99 \pm 0.15$  | $0.58 \pm 0.01$ | $3.11 \pm 0.10$ | $3.05 \pm 0.10$ | $2.37 \pm 0.11$  | $0.48 \pm 0.01$ |
|             | Apr | $3.42 \pm 0.13$ | $3.35 \pm 0.13$ | $2.25 \pm 0.13$  | $0.40 \pm 0.01$ | $2.65 \pm 0.14$ | $2.60 \pm 0.14$ | $3.08 \pm 0.18$  | $0.54 \pm 0.02$ |
|             | Jul | $3.07 \pm 0.35$ | $3.01 \pm 0.35$ | $3.44 \pm 0.10$  | $0.53 \pm 0.01$ | $2.67 \pm 0.19$ | $2.61 \pm 0.19$ | $2.20 \pm 0.25$  | $0.45 \pm 0.03$ |
|             | All | $3.11 \pm 0.21$ | $3.05 \pm 0.20$ | $2.82 \pm 0.15$  | $0.48 \pm 0.02$ | $3.01 \pm 0.14$ | $2.96 \pm 0.13$ | $2.50 \pm 0.13$  | $0.46 \pm 0.02$ |
| 20          | Nov | $2.59 \pm 0.04$ | $2.54 \pm 0.04$ | $23.64 \pm 1.86$ | $0.90 \pm 0.01$ | $3.18 \pm 0.13$ | $3.12 \pm 0.13$ | $31.03 \pm 1.74$ | $0.91 \pm 0.01$ |
|             | Feb | $2.60 \pm 0.13$ | $2.55 \pm 0.13$ | $10.93 \pm 1.13$ | $0.81 \pm 0.02$ | $3.82 \pm 0.42$ | $3.74 \pm 0.41$ | $21.69 \pm 1.17$ | $0.85 \pm 0.01$ |
|             | Apr | $3.09 \pm 0.15$ | $3.03 \pm 0.15$ | $15.60 \pm 2.89$ | $0.97 \pm 0.01$ | $2.28 \pm 0.13$ | $2.23 \pm 0.13$ | $34.23 \pm 4.40$ | $0.94 \pm 0.01$ |
|             | Jul | $2.15 \pm 0.12$ | $2.10 \pm 0.11$ | $17.03 \pm 0.66$ | $0.89 \pm 0.00$ | $1.86 \pm 0.07$ | $1.82 \pm 0.07$ | $7.72 \pm 0.47$  | $0.81 \pm 0.01$ |
|             | All | $2.61 \pm 0.11$ | $2.56 \pm 0.11$ | $16.80 \pm 1.59$ | $0.89 \pm 0.01$ | $2.78 \pm 0.25$ | $2.73 \pm 0.25$ | $23.67 \pm 3.28$ | $0.87 \pm 0.02$ |
| 35          | Nov | $3.15 \pm 0.06$ | $3.09 \pm 0.06$ | $19.70 \pm 2.10$ | $0.86 \pm 0.01$ | $4.60 \pm 0.02$ | $4.51 \pm 0.02$ | $5.10 \pm 0.69$  | $0.52 \pm 0.04$ |
|             | Feb | $7.03 \pm 0.27$ | $6.90 \pm 0.17$ | $2.01 \pm 0.03$  | $0.22 \pm 0.00$ | $7.90 \pm 0.58$ | $7.74 \pm 0.56$ | $0.64 \pm 0.12$  | $0.23 \pm 0.02$ |
|             | Apr | $3.48 \pm 0.27$ | $3.41 \pm 0.26$ | $6.41 \pm 0.22$  | $1.14 \pm 0.01$ | $4.74 \pm 0.12$ | $4.64 \pm 0.12$ | $11.45 \pm 1.03$ | $0.71 \pm 0.02$ |
|             | Jul | $2.88 \pm 0.24$ | $2.82 \pm 0.23$ | $14.85 \pm 0.01$ | $1.01 \pm 0.01$ | $2.56 \pm 0.64$ | $2.51 \pm 0.63$ | $9.18 \pm 1.56$  | $0.85 \pm 0.08$ |
|             | All | $4.14 \pm 0.52$ | $4.05 \pm 0.51$ | $9.92 \pm 2.28$  | $0.81 \pm 0.11$ | $4.95 \pm 0.61$ | $4.85 \pm 0.59$ | $6.36 \pm 1.33$  | $0.58 \pm 0.07$ |

<https://doi.org/10.1371/journal.pone.0292211.t003>

### Effects of temperature on PSII photoinactivation and repair

The effects of the exposure to low and high temperatures were very marked and generally characterized by increases in PSII photoinactivation (higher  $k_{PI}$ ) and decreases in PSII repair capacity (lower  $k_{REC}$ ) (Fig 6; Table 3). Exposure to cold conditions resulted in similar  $k_{PI}$  values in VA-EPL and GE-EPM samples (averaging  $3.11$  and  $3.01 \times 10^{-4} s^{-1}$ , respectively; Table 3), which were not significantly different from each other (ANOVA,  $F_{2,12}$ ,  $P = 0.697$ ). Exposure to heat also caused similar effects on the  $k_{PI}$  measured in the two types of samples (averaging  $4.14$  and  $4.54 \times 10^{-4} s^{-1}$ , respectively; Table 3), not significantly different (ANOVA,  $F_{2,12}$ ,  $p = 0.318$ ).  $k_{PI}$  did not vary significantly between 5 and 20°C (ANOVA, Tukey HSD,  $p = 0.563$ ), but varied significantly between these two temperatures and 35°C (ANOVA, Tukey HSD,  $p < 0.001$ ). Regarding  $k_{REC}$ , also similar responses were measured for VA-EPL and GE-EPM samples, both for exposure to cold (mean values of  $2.82$  and  $2.66 \times 10^{-4} s^{-1}$ , respectively; Table 3) and heat (mean values of  $9.92$  and  $6.36 \times 10^{-4} s^{-1}$ , respectively; Table 3; non-significant differences in both cases, ANOVA,  $F_{2,12}$ ,  $p = 0.121$  and  $p = 0.218$ , respectively).  $k_{REC}$  varied significantly between the three tested temperatures (ANOVA, Tukey HSD,  $P < 0.05$  in all cases).

The effects of cold and moderate heat on  $k_{PI}$  and  $k_{REC}$  were highlighted by calculating the induced change relatively to 20°C ( $\Delta k_{PI}$  and  $\Delta k_{REC}$ ; Fig 7). This representation of the data reinforces the patterns described above, showing that cold caused overall larger effects on PSII repair capacity than on photoinactivation (average variation: +17% and -84% for  $k_{PI}$  and  $k_{REC}$ , respectively) and heat caused comparable large effects on the two processes (average variation: +67% and -50% for  $k_{PI}$  and  $k_{REC}$ , respectively).

Fig 7 also emphasizes that the effects of cold and heat exposure vary with the thermal acclimation state of the samples. The data show a tendency for stronger effects of heat exposure in winter, on cold-acclimated samples, and for stronger effects of cold exposure in summer, on heat-acclimated samples. Regarding  $k_{PI}$ , exposure to cold generally caused an increase when compared to 20°C, reaching on average 20.78% and 13.9% for VA-EPL and GE-EPM,

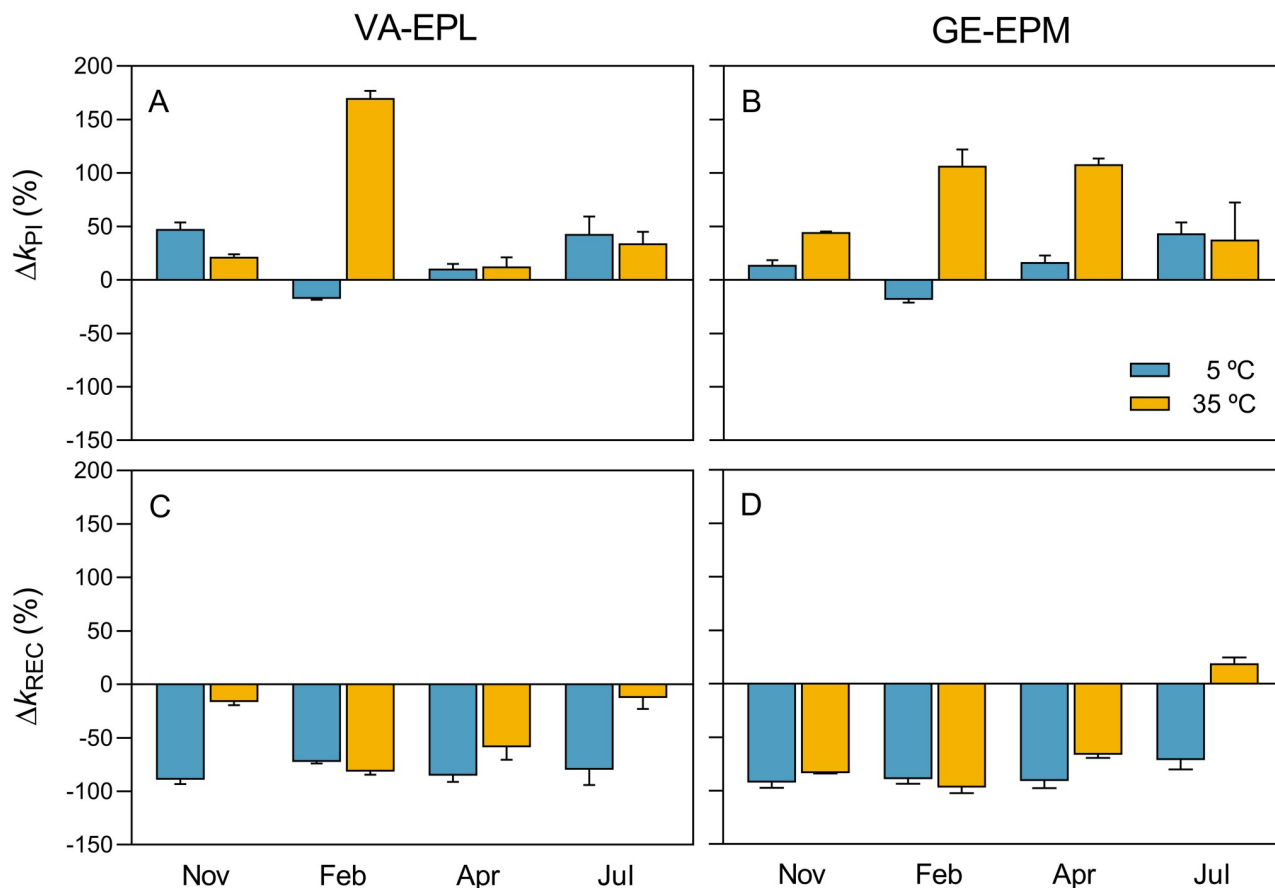

**Fig 7. Seasonal variation of the effects of thermal stress:  $\Delta k_{PI}$  and  $\Delta k_{REC}$ .** Cold and heat-induced (5 and 35 °C, respectively) change of the rate constants of photoinactivation ( $\Delta k_{PI}$ ) (A, B) and repair ( $\Delta k_{REC}$ ) (C, D) of PSII (in relation to values measured at 20 °C) for VA-EPL (A, C) and GE-EPM (B, D) communities.

<https://doi.org/10.1371/journal.pone.0292211.g007>

respectively. A well-defined seasonal pattern was observed, similar for VA-EPL and GE-EPM samples, characterized by higher  $k_{PI}$  values in July, on high temperature-acclimated samples, and lowest values in February, when samples were acclimated to cold conditions. (Fig 7A and 7B). Exposure to moderate heat caused in all cases an increase in  $k_{PI}$ , with overall larger effects in GE-EPM (74.4%) than in VA-EPL samples (59.6%), and maximum values in winter and minimum values in autumn and summer. Most notable difference between the two sites regarded April, when  $k_{PI}$  was much lower in VA-EPL than in GE-EPM (Fig 7A and 7B). As pointed out above, overall effects on  $k_{PI}$  were larger under 35 °C than under 5 °C, reaching on average 67.0% and 17.3%, respectively.

Regarding  $k_{REC}$ , cold exposure caused large decreases, similarly in VA-EPL and GE-EPM samples (-81.8% and -86.0%, respectively). Exposure to 35 °C also caused similar effects on the two types of communities, reaching -57.0% and -42.5% for VA-EPL and GE-EPM, respectively (Fig 7C and 7D). A marked seasonal variation was evident for VA-EPL samples, with maximum effects in winter and spring, when samples were acclimated to low temperatures. For GE-EPM, minimum effects (the only positive change) were observed in July, when samples were acclimated to high temperatures (Fig 7C and 7D). Overall, exposure to cold caused stronger effects than exposure to heat, attaining on average -83.9% and -49.8%, respectively. Cold- and heat-induced changes were globally higher for  $k_{REC}$  (-66.8%) than for  $k_{PI}$  (42.2%), and on

average higher for GE-EPM (44.1% and -71.5%, for  $k_{PI}$  and  $k_{REC}$ , respectively) than for VA-EPL (40.2% and -62.1%, for  $k_{PI}$  and  $k_{REC}$ , respectively).

### PSII photoinactivation and repair vs photoprotection

Under non-stressed conditions (20°C),  $q_E$  reached high values (minimum value 0.81; Table 3), all year round in both sites, denoting an efficient capacity of the MPB communities to recover from high light stress.  $q_E$  was markedly affected by the temperature treatments, especially under cold conditions. Under 5°C, a generalized decrease was observed, with maximum value remaining below 0.6, and the lowest values recorded in November (Table 3). Under moderate heat, the response varied with season, with the lowest values being observed for February, in both sites (Table 3).

Significant linear negative relationships were found between  $k_{PI}$  and  $q_E$  for both 5°C and 35°C, but not for 20°C (Fig 8A–8C), suggesting an important role of photoprotective mechanisms in preventing PSII photoinactivation under extreme temperatures. Significant linear relationships were also found between  $k_{REC}$  and  $q_E$  for both 5°C and 35°C, but not for 20°C (Fig 8D–8F). In this case, the relationships were positive, indicating a direct dependency of PSII repair on the photoprotection capacity under extreme temperature conditions. The linear relationships with  $q_E$  were stronger for  $k_{PI}$  than for  $k_{REC}$  (Fig 8A, 8C, 8D and 8F). No significant linear relationships were found between  $k_{PI}$  and  $k_{REC}$ , for any of the tested temperatures.

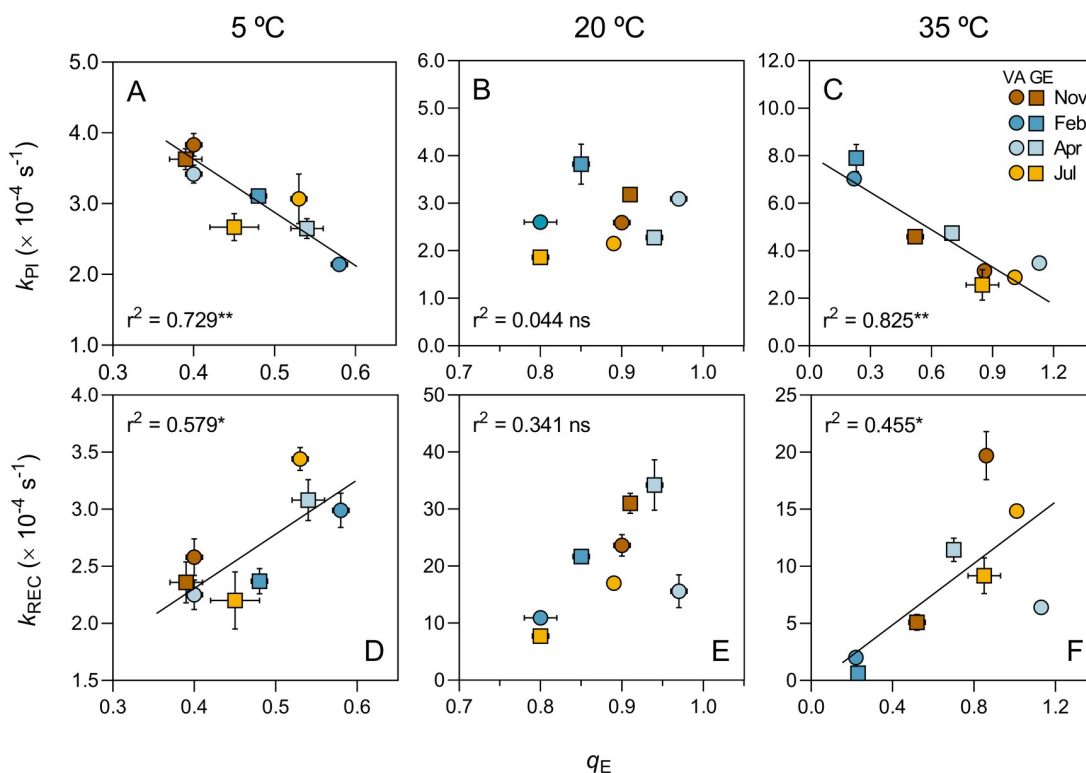

**Fig 8. Rate constants vs NPQ.** Relationship between the rate constants of photoinactivation ( $k_{PI}$ ; A–C) and repair ( $k_{REC}$ ; D–F) of PSII and energy-dependent quenching ( $q_E$ ) for samples exposed to 5 (A, D), 20 (B, E) and 35 (C, F) °C. Sampling site and occasion are identified by shape and color of data points, respectively.

<https://doi.org/10.1371/journal.pone.0292211.g008>

## Discussion

### Variation of $k_{PI}$ and $k_{REC}$ with photoacclimation

One main objective of this work was to study how the susceptibility to PSII photoinactivation and the capacity for PSII repair, and their responses to extreme temperature, varies with the photoacclimation state of the MPB communities. The results showed that no substantial changes in the photoacclimation state occurred over the studied seasonal cycle. Both EPL and EPM communities appeared high light acclimated all year round, although the VA-EPL samples appeared generally more high light-acclimated than the GE-EPM ones. The high light-acclimated photophenotype was confirmed by the ability to cope well with the exposure to high light, supported by the hysteresis light-response curves of both rETR and Y(NPQ): in all cases HLCs showed a positive but low hysteresis, indicative of absence or small cumulative negative effects on photosynthesis [53], especially considering that LCs included E levels as high as  $2250 \mu\text{mol quanta m}^{-2} \text{s}^{-1}$ . As observed for rETR, the EPL communities generally displayed a more pronounced high light-acclimated state in terms of their light response of Y(NPQ).

The high-light acclimation state of the MPB of the Ria de Aveiro throughout the year has been reported before [2, 31]. Also the absence of substantial seasonal changes has been documented [59], although contradicted by posterior studies [2]. On the basis of this apparent contradiction is likely the large variability in the photosynthetic light response of natural samples, susceptible to large variability at sub-seasonal time scales (spring-neap cycle tidal; [2]). The differences between the mentioned studies can also be related to the methodology used to generate the LCs: seasonal differences were found when applying rapid LCs protocols [2] but not when measuring steady state LCs [59], as in the present study.

The more pronounced light-acclimation photophenotype of the VA-EPL communities, and the absence of clear seasonal patterns, can be explained by the behavioral regulation of light exposure, through vertical migration of the diatom cells within the thin photic zone of the sediment [20, 24]. By enabling cells to remain under light levels that maximize photosynthesis, their photobehavior may contribute to the maintenance of a marked high light-acclimation state all year round, independently of the seasonal change of incident solar light [35]. The large variability in the photoacclimation state on natural communities may also be the cause of the conflicting results that have been reported for the MPB of the VA-EPL and GE-EPM sites of the Ria de Aveiro. In the present work, in comparison with GE-EPM, the EPL-VA samples showed significantly higher values of  $\alpha$  and of  $Y(NPQ)_m$ , in agreement with one study [31] but not with another [2].

Despite the absence of large seasonal variations in photoacclimation state, both  $k_{PI}$  and  $k_{REC}$  varied significantly with the time of the year, indicating that the processes underlying changes in the susceptibility to PSII photoinactivation and in the PSII repair capacity may vary independently from the photosynthetic use of light. Nevertheless, the consistent observation of minimum  $k_{PI}$  values in July may indicate a beneficial effect of the exposure to high solar irradiance on reducing PSII photoinactivation.

The extent of photoinactivation suffered by the MPB communities measured in this study are aligned with data from previous studies. Converting the values of  $k_{PI}$  to the relative quantum yield of photoinactivation,  $\Phi_{PI}$ , a parameter independent from the E level applied that facilitates inter-studies comparisons ( $\Phi_{PI} = k_{PI}/E$ ; [16]), the results reached in this study,  $2.10$  and  $1.82 \times 10^{-7} \text{ m}^2 \mu\text{mol quanta}^{-1}$  for VA-EPL and GE-EPM, respectively (July; Table 3), match closely, both in terms of relative (higher values for VA-EPL) and absolute values, previous estimates of  $3.25$  vs  $1.27 \times 10^{-7} \text{ m}^2 \mu\text{mol quanta}^{-1}$  for the same sites and season (August; [31]). The global range of  $\Phi_{PI}$  determined in this study, varying between  $2.10$  and  $3.74 \times 10^{-7}$

$\text{m}^2 \mu\text{mol quanta}^{-1}$  (Table 3), also agree with data recently compiled for diatoms, averaging  $3.72 \times 10^{-7} \text{ m}^2 \mu\text{mol quanta}^{-1}$  [60].

Consistent across sampling sites and occasions was the finding that, under non-stress conditions ( $20^\circ\text{C}$ ),  $k_{\text{REC}}$  typically reached values much higher than the corresponding  $k_{\text{PI}}$ , on average almost 10x higher ( $20.4$  vs  $2.70 \times 10^{-4} \text{ s}^{-1}$ , respectively). This result may be interpreted as indicative of efficient repair mechanisms, allowing the cells to maintain a stable pool of active PSII [13]. Large PSII repair rates would explain the high recovery capacity demonstrated by the high  $q_E$  values generally measured across sites and seasons. Such high PSII repair capacity is advantageous when exposure to photoinhibitory conditions cannot be avoided, especially frequent in the intertidal environment. However, high  $k_{\text{REC}}$  values may result from the erroneous assumption, based on the Kok model, that there are no significant amounts of inactive PSII before the exposure to light stress (Campbell & Serôdio 2021). This may be the case in the present study, as there is evidence that diatoms are able to maintain a pool of inactive PSII as substrate for repair (Lavaud et al. 2016) [21].

### Effects of thermal stress on PSII photoinactivation and repair

The main novelty of this study was the attempt to quantify the effects of acute, short-term exposure to extreme temperatures on PSII photoinactivation and repair in natural MPB communities, simulating the sudden changes in temperature that often occur in the intertidal environment. The results revealed clear patterns of response to cold and heat stress, similar in both VA-EPL and GE-EPM communities, characterized by: (i) extreme temperatures affected both PSII repair capacity (decreasing  $k_{\text{REC}}$ ) and PSII photoinactivation (increasing in  $k_{\text{PI}}$ ); (ii) overall, the effects were higher on PSII repair capacity (large decreases in  $k_{\text{REC}}$ ) than on PSII photoinactivation (moderate increases in  $k_{\text{PI}}$ ); (iii) cold stress caused larger effects on the repair capacity (decrease of  $k_{\text{REC}}$ ) than on photoinactivation of PSII (increase of  $k_{\text{PI}}$ ); (iv) heat stress caused comparable large effects on the two processes.

These results are consistent with previous studies, carried out on a variety of organisms. Cold stress is known to increase PSII inactivation (increase in  $k_{\text{PI}}$ ) by enhancing various photoinhibitory mechanisms, such as the double reduction of the primary electron acceptor of PSII ( $Q_A$ ; acceptor-side mechanism) and single oxygen production from recombination processes [14]. Cold can also limit PSII repair (decrease in  $k_{\text{REC}}$ ) [13, 51], as it inhibits protein synthesis, including the target of photoinhibition, the PSII D1 protein [61]. Low temperatures affect especially the processing of pre-D1 protein, a step in the formation of mature D1 protein and in the assembly of the active PSII complex [62]. On the other hand, moderate heat stress aggravates net photoinhibition both through the direct inactivation of the oxygen-evolving complex (increase in  $k_{\text{PI}}$ ) and the inhibition of PSII repair (decrease in  $k_{\text{REC}}$ ) [62].

Despite these common overall patterns of variation of the two studied communities, GE-EPM samples tended to suffer larger impacts of cold and heat stress and to show a more pronounced seasonal variation than VA-EPL. Under non-stress conditions, the differences observed between the two communities are in agreement with previous results for the same sampling sites and time of the year (summer; [31]), with both  $k_{\text{PI}}$  and  $k_{\text{REC}}$  reaching higher values for VA-EPL, supporting the trade-off between motility and physiology. This pattern, however, was not observed for other seasons, when  $k_{\text{PI}}$  was higher in VA-EPL samples only in April, and  $k_{\text{REC}}$  was in all cases lower in VA-EPL than in GE-EPM samples. These results indicate that, with the exception of the summer months, the motility of EPL species is not associated to a lower physiological capacity for preventing photoinactivation but is associated to a lower capacity for PSII in comparison with non-motile EPM forms. Under cold and heat stress, the results generally agree with the abovementioned study regarding  $k_{\text{REC}}$  (higher values

for VA-EPL, excepting cold stress in spring), but not regarding  $k_{PI}$ : identical (cold stress) or higher (heat stress) values were reached in GE-EPM in comparison with VA-EPL.

The results on the relative importance of PSII photoinactivation and repair in motile and non-motile diatom forms under thermal stress force to revise and extend the trade-off hypothesis. A trade-off between motility- and physiology-based photoprotection appear to exist, not so much regarding the susceptibility to PSII photoinactivation (capacity for motility allows a lower physiological photoprotection) but mainly regarding PSII repair: motile forms have a higher inherent capacity for repair than the immotile forms. This aspect, reported before for room temperature [31], is shown in this study to be especially important under thermal stress. This seems ecophysiologically relevant, as in the intertidal environment extreme temperatures typically occur during low tide, when the cells are often also exposed to potentially photoinhibitory high light levels. The higher repair capacity of EPL forms may be associated to the use of light-driven motility to seek and remain under the high light conditions in the upper layers of the sediment, maximizing photosynthesis and growth [35]. The permanence in these layers for long periods requires the capacity to cope adequately with high light conditions, consistent with the particularly accentuated high light-acclimation state observed of EPL samples, for which an efficient PSII repair capacity is clearly advantageous.

While seasonal changes in PSII photoinactivation and repair rates were not strongly associated to changes in photoacclimation state, the results suggest that changes in thermal acclimation throughout the year may have mediated the responses to cold and heat treatments. In fact, heat exposure tended to cause stronger effects in winter, when cells are acclimated to low ambient temperatures, while the cold stress tended to cause stronger effects in summer, when cells were expected to be acclimated to high ambient temperatures. Thermal acclimation has been shown to have effects on both PSII susceptibility to photoinactivation [63] and on PSII repair rates [51], although the underlying mechanisms are not yet identified.

### PSII photoinactivation and repair vs photoprotection capacity

The absence of an association between  $q_E$  and both  $k_{PI}$  and  $k_{REC}$  under thermal stress-free conditions is an indication that changes in PSII photoinactivation and repair occur independently of the photoprotection capacity of both EPL and EPM communities. This means that photoprotection conferred by NPQ processes, presumably very efficient considering the high values of  $q_E$ , is not sufficient to effectively protect the cells from increases in PSII photoinactivation or decreases in PSII repair caused by high light exposure. This non-correlated variation between  $q_E$  and  $k_{PI}$  and  $k_{REC}$  may be also due to the relatively small range of variation of  $q_E$  amongst sites and seasons that was observed under 20°C.

In contrast, the significant correlations found between  $q_E$  and both  $k_{PI}$  and  $k_{REC}$  under cold and heat conditions suggest a strong effect of changes in photoprotection capacity on PSII photoinactivation and repair processes. This is supported by the observation that the decrease in photoprotection capacity, caused by the acute stress induced by cold and heat exposure, is followed by a substantial increase in susceptibility to photoinactivation and decrease in repair capacity. The inverse relationships observed between  $k_{PI}$  and  $q_E$  for both 5 and 35°C support that a higher photoprotection capacity contributes to reducing the PSII photoinactivation caused by thermal stress. On the other hand, the positive relationships found between  $k_{REC}$  and  $q_E$  suggest a direct dependency of PSII repair on photoprotective mechanisms. These appear to protect the PSII repair process from the effects of thermal stress, as the decrease in repair capacity under cold and heat exposure is alleviated under high  $q_E$ . These results indicate that photoprotection processes have an important role under acute thermal stress when the limitation of PSII photoinactivation and the activation of repair processes is more needed.

## Mode of action of abiotic stress

Photoinhibition induced by abiotic stress has been traditionally viewed as resulting from the direct action of ROS in promoting PSII inactivation. However, recent experimental evidence has suggested a 'new paradigm' of photoinhibition, according to which: (i) abiotic stressors, including cold and moderate heat, act primarily by inhibiting or decelerating the repair of damaged PSII rather than by causing significant direct PSII photoinactivation; (ii) photoprotective mechanisms act mainly by protecting PSII repair from ROS action and not by preempting PSII photoinactivation [62, 64, 65]. The results of this study shed light on the validity of this hypothesis on benthic diatoms. Although effects differ between cold and moderate heat exposure, in both cases acute thermal stress was found to cause photoinhibition and impact photosynthetic activity both through increase in susceptibility to photoinactivation and inhibiting repair. The new scheme is not supported by the observation of significant direct effects on  $k_{PI}$  and by the comparable large effects on  $k_{PI}$  and  $k_{REC}$  (with tendency for stronger impacts on the former) caused by heat stress. On the other hand, cold stress affects more severely PSII repair capacity than photoinactivation, a result aligned with the new paradigm. Also contrary to new scheme is the observation that photoprotection effectively reduces PSII photoinactivation, although a positive effect on repair was also observed. It may thus be concluded that, regarding MPB diatoms, the 'old' and 'new' schemes are not mutually exclusive, but that an intermediate state between these two extremes is the one that better describes the responses of these natural communities to thermal stress.

## Supporting information

**S1 File.** STL file for 3D-printing the custom-designed cuvette holder and water jacket. (STL)

## Acknowledgments

We thank two reviewers for valuable comments on the manuscript.

## Author Contributions

**Conceptualization:** Silja Frankenbach, João Serôdio.

**Data curation:** Cláudia Bártolo, Silja Frankenbach, João Serôdio.

**Formal analysis:** Cláudia Bártolo, João Serôdio.

**Funding acquisition:** João Serôdio.

**Investigation:** Cláudia Bártolo, Silja Frankenbach.

**Methodology:** Silja Frankenbach, João Serôdio.

**Project administration:** João Serôdio.

**Resources:** João Serôdio.

**Software:** João Serôdio.

**Supervision:** Silja Frankenbach, João Serôdio.

**Validation:** João Serôdio.

**Visualization:** João Serôdio.

**Writing – original draft:** João Serôdio.

**Writing – review & editing:** Cláudia Bártolo, Silja Frankenbach, João Serôdio.

## References

- Underwood GJC, Kromkamp J. Primary Production by Phytoplankton and Microphytobenthos in Estuaries. *Advances in Ecological Research*. 1999. pp. 93–153. [https://doi.org/10.1016/S0065-2504\(08\)60192-0](https://doi.org/10.1016/S0065-2504(08)60192-0)
- Frankenbach S, Ezequiel J, Plecha S, Goessling JW, Vaz L, Kühl M, et al. Synoptic spatio-temporal variability of the photosynthetic productivity of microphytobenthos and phytoplankton in a tidal estuary. *Front Mar Sci*. 2020; 7: 1–22. <https://doi.org/10.3389/fmars.2020.00170>
- Hope JA, Paterson DM, Thrush SF. The role of microphytobenthos in soft-sediment ecological networks and their contribution to the delivery of multiple ecosystem services. Van Alstyne K, editor. *J Ecol*. 2019; 1365–2745.13322. <https://doi.org/10.1111/1365-2745.13322>
- Serôdio J, Catarino F. Fortnightly light and temperature variability in estuarine intertidal sediments and implications for microphytobenthos primary productivity. *Aquat Ecol*. 1999; 33: 235–241. <https://doi.org/10.1023/A:1009989229098>
- Brotas V, Serôdio J, Risgaard-Petersen N, Dalsgaard T, Serôdio J, Ottosen L, et al. In situ measurements of photosynthetic activity and respiration of intertidal benthic microalgal communities undergoing vertical migration. *Ophelia*. 2003; 57: 13–26. <https://doi.org/10.1080/00785236.2003.10409502>
- Chevalier EMM, Gévaert F, Créach A. *In situ* photosynthetic activity and xanthophylls cycle development of undisturbed microphytobenthos in an intertidal mudflat. *J Exp Mar Bio Ecol*. 2010; 385: 44–49. <https://doi.org/10.1016/j.jembe.2010.02.002>
- Perkins RG, Underwood GJC, Brotas V, Snow GC, Jesus B, Ribeiro L. Responses of microphytobenthos to light: primary production and carbohydrate allocation over an emersion period. *Mar Ecol Prog Ser*. 2001; 223: 101–112. <https://doi.org/10.3354/meps223101>
- Laviale M, Barnett A, Ezequiel J, Lepetit B, Frankenbach S, Méléder V, et al. Response of intertidal benthic microalgal biofilms to a coupled light-temperature stress: evidence for latitudinal adaptation along the Atlantic coast of Southern Europe. *Environ Microbiol*. 2015; 17: 3662–3677. <https://doi.org/10.1111/1462-2920.12728> PMID: 25471657
- Guarini JM, Blanchard GF, Gros P, Harrison SJ. Modelling the mud surface temperature on intertidal flats to investigate the spatio-temporal dynamics of the benthic microalgal photosynthetic capacity. *Mar Ecol Prog Ser*. 1997; 153: 25–36.
- Serôdio J, Vieira S, Cruz S. Photosynthetic activity, photoprotection and photoinhibition in intertidal microphytobenthos as studied *in situ* using variable chlorophyll fluorescence. *Cont Shelf Res*. 2008; 28: 1363–1375. <https://doi.org/10.1016/j.csr.2008.03.019>
- Coelho H, Vieira S, Serôdio J. Effects of desiccation on the photosynthetic activity of intertidal microphytobenthos biofilms as studied by optical methods. *J Exp Mar Bio Ecol*. 2009; 381: 98–104. <https://doi.org/10.1016/j.jembe.2009.09.013>
- Frankenbach S, Azevedo AA, Reis V, Dias D, Vaz L, Dias JM, et al. Functional resilience of PSII, vertical distribution and ecosystem-level estimates of subsurface microphytobenthos in estuarine tidal flats. *Cont Shelf Res*. 2019; 182: 46–56. <https://doi.org/10.1016/j.csr.2019.05.018>
- Campbell DA, Serôdio J. Photoinhibition of photosystem II in phytoplankton: Processes and patterns. In: Larkum AWD, Raven JA, Grossman AR, editors. *Photosynthesis in Algae, Advances in Photosynthesis and Respiration* 45. Springer Nature Switzerland AG 2020; 2020. pp. 329–365.
- Tyystjärvi E. Photoinhibition of Photosystem II. *Int Rev Cell Mol Biol*. 2013; 300: 243–303. <https://doi.org/10.1016/B978-0-12-405210-9.00007-2> PMID: 23273864
- Nath K, Jajoo A, Poudyal RS, Timilsina R, Park YS, Aro EM, et al. Towards a critical understanding of the photosystem II repair mechanism and its regulation during stress conditions. *FEBS Lett*. 2013; 587: 3372–3381. <https://doi.org/10.1016/j.febslet.2013.09.015> PMID: 24056074
- Campbell DA, Tyystjärvi E. Parameterization of photosystem II photoinactivation and repair. *Biochim Biophys Acta*. 2012; 1817: 258–65. <https://doi.org/10.1016/j.bbabi.2011.04.010> PMID: 21565161
- Raven JA. The cost of photoinhibition. *Physiol Plant*. 2011; 142: 87–104. <https://doi.org/10.1111/j.1399-3054.2011.01465.x> PMID: 21382037
- Admiraal W. The ecology of estuarine sediment-inhabiting diatoms. *Prog Phycol Res*. 1984; 3: 269–322.
- Waring J, Baker NR, Underwood GJC. Responses of estuarine intertidal microphytobenthic algal assemblages to enhanced ultraviolet B radiation. *Glob Chang Biol*. 2007; 13: 1398–1413. <https://doi.org/10.1111/j.1365-2486.2007.01378.x>

20. Serôdio J, Coelho H, Vieira S, Cruz S. Microphytobenthos vertical migratory photoresponse as characterised by light-response curves of surface biomass. *Estuar Coast Shelf Sci.* 2006; 68: 547–556. <https://doi.org/10.1016/j.ecss.2006.03.005>
21. Lavaud J, Goss R. Non-Photochemical Quenching and Energy Dissipation in Plants, Algae and Cyanobacteria. Demmig-Adams B, Garab G, Adams W III, Govindjee, editors. *Non-Photochemical Quenching and Energy Dissipation in Plants, Algae and Cyanobacteria. Advances in Photosynthesis and Respiration* 40. Dordrecht: Springer Netherlands; 2014. <https://doi.org/10.1007/978-94-017-9032-1>
22. Barnett A, Méléder V, Blommaert L, Lepetit B, Gaudin P, Vyverman W, et al. Growth form defines physiological photoprotective capacity in intertidal benthic diatoms. *ISME J.* 2015; 9: 32–45. <https://doi.org/10.1038/ismej.2014.105> PMID: 25003964
23. Serôdio J, Da Silva JM, Catarino F. Use of *in vivo* chlorophyll *a* fluorescence to quantify short-term variations in the productive biomass of intertidal microphytobenthos. *Mar Ecol Prog Ser.* 2001; 218: 45–61. <https://doi.org/10.3354/meps218045>
24. Laviale M, Frankenbach S, Serôdio J. The importance of being fast: comparative kinetics of vertical migration and non-photochemical quenching of benthic diatoms under light stress. *Mar Biol.* 2016; 163: 1–12. <https://doi.org/10.1007/s00227-015-2793-7>
25. Van Leeuwe MA, Brotas V, Consalvey M, Forster RM, Gillespie D, Jesus B, et al. Photoacclimation in microphytobenthos and the role of xanthophyll pigments. *Eur J Phycol.* 2008; 43: 123–132. <https://doi.org/10.1080/09670260701726119>
26. Mouget JL, Perkins R, Consalvey M, Lefebvre S. Migration or photoacclimation to prevent high irradiance and UV-B damage in marine microphytobenthic communities. *Aquat Microb Ecol.* 2008; 52: 223–232. <https://doi.org/10.3354/ame01218>
27. Pniewski FF, Biskup P, Bubak I, Richard P, Latała A, Blanchard G. Photo-regulation in microphytobenthos from intertidal mudflats and non-tidal coastal shallows. *Estuar Coast Shelf Sci.* 2015; 152: 153–161. <https://doi.org/10.1016/j.ecss.2014.11.022>
28. Blommaert L, Huysman MJJ, Vyverman W, Lavaud J, Sabbe K. Contrasting NPQ dynamics and xanthophyll cycling in a motile and a non-motile intertidal benthic diatom. *Limnol Oceanogr.* 2017; 62: 1466–1479. <https://doi.org/10.1002/lno.10511>
29. Ezequiel J, Laviale M, Frankenbach S, Cartaxana P, Serôdio J. Photoacclimation state determines the photobehaviour of motile microalgae: The case of a benthic diatom. *J Exp Mar Bio Ecol.* 2015; 468: 11–20. <https://doi.org/10.1016/j.jembe.2015.03.004>
30. Cartaxana P, Ruivo M, Hubas C, Davidson I, Serôdio J, Jesus B. Physiological versus behavioral photo-protection in intertidal epipelagic and epipsammic benthic diatom communities. *J Exp Mar Bio Ecol.* 2011; 405: 120–127. <https://doi.org/10.1016/j.jembe.2011.05.027>
31. Frankenbach S, Schmidt W, Frommlet J, Serôdio J. Photoinactivation, repair and the motility-physiology trade-off in microphytobenthos. *Mar Ecol Prog Ser.* 2018; 601: 41–57. <https://doi.org/10.3354/meps12670>
32. Jesus B, Brotas V, Ribeiro L, Mendes CR, Cartaxana P, Paterson DM. Adaptations of microphytobenthos assemblages to sediment type and tidal position. *Cont Shelf Res.* 2009; 29: 1624–1634. <https://doi.org/10.1016/j.csr.2009.05.006>
33. Juneau P, Barnett A, Méléder V, Dupuy C, Lavaud J. Combined effect of high light and high salinity on the regulation of photosynthesis in three diatom species belonging to the main growth forms of intertidal flat inhabiting microphytobenthos. *J Exp Mar Bio Ecol.* 2015; 463: 95–104. <https://doi.org/10.1016/j.jembe.2014.11.003>
34. Ribeiro L, Brotas V, Rincé Y, Jesus B. Structure and diversity of intertidal benthic diatom assemblages in contrasting shores: a case study from the Tagus estuary 1. *J Phycol.* 2013; 49: 258–270. <https://doi.org/10.1111/jpy.12031> PMID: 27008515
35. Serôdio J, Bastos A, Morelle J, Frankenbach S. Light niche construction: Motility of sediment-inhabiting diatoms determines the experienced light environment. *Ecol Modell.* 2023; 481: 110379. <https://doi.org/10.1016/j.ecolmodel.2023.110379>
36. Pniewski FF, Richard P, Latała A, Blanchard G. Non-photochemical quenching in epipsammic and epipelagic microalgal assemblages from two marine ecosystems. *Cont Shelf Res.* 2017; 136: 74–82. <https://doi.org/10.1016/j.csr.2016.12.013>
37. MacIntyre HL, Kana TM, Anning T, Geider RJ. Photoacclimation of photosynthesis irradiance response curves and photosynthetic pigments in microalgae and cyanobacteria. *J Phycol.* 2002; 38: 17–38. <https://doi.org/10.1046/j.1529-8817.2002.00094.x>
38. Han B-PP. A mechanistic model of algal photoinhibition induced by photodamage to photosystem-II. *J Theor Biol.* 2002; 214: 519–527. <https://doi.org/10.1006/jtbi.2001.2468> PMID: 11851364

39. Falkowski PG, Raven JA. Aquatic Photosynthesis. Second. Princeton and Oxford: Princeton University Press; 2007.
40. Serôdio J, Schmidt W, Frankenbach S. A chlorophyll fluorescence-based method for the integrated characterization of the photophysiological response to light stress. *J Exp Bot*. 2017; 68: 1123–1135. <https://doi.org/10.1093/jxb/erw492> PMID: 28069780
41. Soitamo A, Havurinne V, Tyystjärvi E. Photoinhibition in marine picocyanobacteria. *Physiol Plant*. 2017; 161: 97–108. <https://doi.org/10.1111/ppl.12571> PMID: 28370227
42. Jeans J, Campbell DA, Hoogenboom MO. Increased reliance upon photosystem II repair following acclimation to high-light by coral-dinoflagellate symbioses. *Photosynth Res*. 2013; 118: 219–29. <https://doi.org/10.1007/s11120-013-9918-y> PMID: 24062202
43. Ragni M, Airs RL, Leonardos N, Geider RJ. Photoinhibition of PSII in *Emiliania huxleyi* (Haptophyta) under high light stress: The roles of photoacclimation, photoprotection, and photorepair. *J Phycol*. 2008; 44: 670–683. <https://doi.org/10.1111/j.1529-8817.2008.00524.x> PMID: 27041425
44. Hennige SJ, McGinley MP, Grottoli AG, Warner ME. Photoinhibition of Symbiodinium spp. within the reef corals *Montastraea faveolata* and *Porites astreoides*: implications for coral bleaching. *Mar Biol*. 2011; 158: 2515–2526. <https://doi.org/10.1007/s00227-011-1752-1>
45. Hill R, Brown CM, DeZeeuw K, Campbell DA, Ralph PJ. Increased rate of D1 repair in coral symbionts during bleaching is insufficient to counter accelerated photo-inactivation. *Limnol Oceanogr*. 2011; 56: 139–146. <https://doi.org/10.4319/lo.2011.56.1.0139>
46. Kato MC, Hikosaka K, Hirotsu N, Makino A, Hirose T. The excess light energy that is neither utilized in photosynthesis nor dissipated by photoprotective mechanisms determines the rate of photoinactivation in photosystem II. *Plant Cell Physiol*. 2003; 44: 318–325. <https://doi.org/10.1093/pcp/pcg045> PMID: 12668778
47. Ragni M, Airs R, Hennige S, Suggett D, Warner M, Geider R. PSII photoinhibition and photorepair in Symbiodinium (Pyrrhophyta) differs between thermally tolerant and sensitive phenotypes. *Mar Ecol Prog Ser*. 2010; 406: 57–70. <https://doi.org/10.3354/meps08571>
48. Serôdio J, Ezequiel J, Barnett A, Mouget J, Méléder V, Laviale M, et al. Efficiency of photoprotection in microphytobenthos: role of vertical migration and the xanthophyll cycle against photoinhibition. *Aquat Microb Ecol*. 2012; 67: 161–175. <https://doi.org/10.3354/ame01591>
49. Eaton JW, Moss B. The estimation of numbers and pigment content in epipelagic algal populations. *Limnol Oceanogr*. 1966; 11: 584–595. <https://doi.org/10.4319/lo.1966.11.4.0584>
50. Kok B. On the inhibition of photosynthesis by intense light. *Biochim Biophys Acta*. 1956; 21: 234–244. [https://doi.org/10.1016/0006-3002\(56\)90003-8](https://doi.org/10.1016/0006-3002(56)90003-8) PMID: 13363902
51. Ni G, Zimbalatti G, Murphy C, Barnett A, Arsenault CM, Li G, et al. Arctic *Micromonas* uses protein pools and non-photochemical quenching to cope with temperature restrictions on Photosystem II protein turnover. *Photosynth Res*. 2017; 131: 1–18. <https://doi.org/10.1007/s11120-016-0310-6> PMID: 27639727
52. Serôdio J, Schmidt W, Frommlet JC, Christa G, Nitschke MR. An LED-based multi-actinic illumination system for the high throughput study of photosynthetic light responses. *PeerJ*. 2018; 6: e5589. <https://doi.org/10.7717/peerj.5589> PMID: 30202661
53. Serôdio J, Moreira D, Bastos A, Cardoso V, Frommlet J, Frankenbach S. Hysteresis light curves: a protocol for characterizing the time dependence of the light response of photosynthesis. *Photosynth Res*. 2022; 154: 57–74. <https://doi.org/10.1007/s11120-022-00954-3> PMID: 36057004
54. Eilers PHC, Peeters JCH. A model for the relationship between light intensity and the rate of photosynthesis in phytoplankton. *Ecol Modell*. 1988; 42: 199–215. [https://doi.org/10.1016/0304-3800\(88\)90057-9](https://doi.org/10.1016/0304-3800(88)90057-9)
55. Serôdio J, Lavaud J. A model for describing the light response of the nonphotochemical quenching of chlorophyll fluorescence. *Photosynth Res*. 2011; 108: 61–76. <https://doi.org/10.1007/s11120-011-9654-0> PMID: 21516348
56. Round FE, Crawford RM, Mann D. The Diatoms—Biology & Morphology of the genera. Cambridge: Cambridge University Press; 1990.
57. Ribeiro L. Intertidal benthic diatoms of the Tagus estuary: taxonomic composition and spatial-temporal variation. University of Lisbon. 2010.
58. Coste M, Rosebery J. Guide iconographique pour la mise en oeuvre de l'Indice Biologique Diatomée 2007. Action 14: Développement et optimisation des méthodes de bioindication pour les cours d'eau. Bordeaux: Cestas Gazinet, Cemagref groupement de Bordeaux; 2011.
59. Serôdio J, Vieira S, Cruz S, Coelho H. Rapid light-response curves of chlorophyll fluorescence in microalgae: relationship to steady-state light curves and non-photochemical quenching in benthic diatom-

- dominated assemblages. *Photosynth Res.* 2006; 90: 29–43. <https://doi.org/10.1007/s11120-006-9105-5> PMID: 17111236
60. Serôdio J, Campbell DA. Photoinhibition in optically thick samples: effects of light attenuation on chlorophyll fluorescence-based parameters. *J Theor Biol.* 2021; 110580. <https://doi.org/10.1016/j.jtbi.2021.110580> PMID: 33444625
  61. Allakhverdiev SI, Murata N. Environmental stress inhibits the synthesis de novo of proteins involved in the photodamage-repair cycle of Photosystem II in *Synechocystis* sp. PCC 6803. *Biochim Biophys Acta—Bioenerg.* 2004; 1657: 23–32. <https://doi.org/10.1016/j.bbabi.2004.03.003> PMID: 15238209
  62. Nishiyama Y, Murata N. Revised scheme for the mechanism of photoinhibition and its application to enhance the abiotic stress tolerance of the photosynthetic machinery. *Appl Microbiol Biotechnol.* 2014; 98: 8777–8796. <https://doi.org/10.1007/s00253-014-6020-0> PMID: 25139449
  63. Wu H, Roy S, Alami M, Green BR, Campbell DA. Photosystem II photoinactivation, repair, and protection in marine centric diatoms. *Plant Physiol.* 2012; 160: 464–476. <https://doi.org/10.1104/pp.112.203067> PMID: 22829321
  64. Murata N, Allakhverdiev SI, Nishiyama Y. The mechanism of photoinhibition in vivo: Re-evaluation of the roles of catalase,  $\alpha$ -tocopherol, non-photochemical quenching, and electron transport. *Biochim Biophys Acta—Bioenerg.* 2012; 1817: 1127–1133. <https://doi.org/10.1016/j.bbabi.2012.02.020> PMID: 22387427
  65. Takahashi S, Murata N. How do environmental stresses accelerate photoinhibition? *Trends Plant Sci.* 2008; 13: 178–182. <https://doi.org/10.1016/j.tplants.2008.01.005> PMID: 18328775
